# Supplementary material for: Inherited Thrombophilia and the Risk of Arterial Ischemic Stroke: A Systematic Review and Meta‐Analysis
Source: PubMed Central journal article supplement — J Am Heart Assoc. 2019 Sep 24;8(19):e012877. doi: 10.1161/JAHA.119.012877 (PMC6806047; doi:10.1161/jaha.119.012877), 2019-09-24
Supplement: JAH3-8-e012877-s001.pdf [file JAH3-8-e012877-s001.pdf]

# **Supplemental Material**

## Data S1.

### Supplemental Methods: Search Strategies

**Database: MEDLINE (PubMed) (From 1946 to December 31<sup>st</sup>, 2018)**

**Search Strategy:**

---

1. Stroke[MeSH] OR "brain ischemia"[MesH] OR stroke[tiab] OR "cerebrovascular accident"[tiab] (298198)
2. Thrombophilia[MeSH] OR thrombophili\* [tiab] OR "inherited thrombophilia"[tiab] (28458)
3. Factor V"[MeSH] OR "Factor V Leiden"[tiab] OR "activated protein C resistance"[MeSH](8387)
4. Prothrombin[MeSH] OR prothrombin mutation [tiab] (10665)
5. Protein C deficiency[MesH] OR protein C deficiency[tiab] (1966)
6. Protein S deficiency[MeSH] OR protein S deficiency[tiab] (1704)
7. Antithrombin III Deficiency[MeSH] OR antithrombin deficiency[tiab] (1565)
8. 2 OR 3 OR 4 OR 5 OR 6 OR 7 (56664)
9. 1 AND 8 (2073)
10. Filters: Publication date to 2018/12/31; Humans; English; Adolescent: 13-18 years; Adult: 19+ year (1115)

#### **MEDLINE (PubMed) Query:**

```
((((("thrombophilia"[MeSH Terms] OR (thrombophilia[tiab] OR thrombophilia'[tiab] OR thrombophilia's[tiab] OR thrombophilic[tiab] OR thrombophilic[tiab] OR thrombophilicity[tiab] OR thrombophilics[tiab] OR thrombophilie[tiab] OR thrombophilies[tiab] OR thrombophilis[tiab]) OR "inherited thrombophilia"[tiab] OR "genetic polymorphisms"[tiab]) OR ("Factor V"[MeSH] OR "Factor V Leiden"[tiab] OR "activated protein C resistance"[MeSH])) OR ("prothrombin"[MeSH Terms] OR prothrombin mutation[tiab]) OR ("protein c deficiency"[MeSH Terms] OR "Protein C deficiency"[tiab])) OR ("protein s deficiency"[MeSH Terms] OR protein S deficiency[tiab])) OR ("antithrombin iii deficiency"[MeSH Terms] OR antithrombin deficiency[tiab])) AND ("stroke"[MeSH Terms] OR "brain ischemia"[MesH] OR stroke[tiab] OR "cerebrovascular accident"[tiab]) AND (("0001/01/01"[PDAT] : "2018/12/31"[PDAT]) AND "humans"[MeSH Terms] AND English[lang] AND ("adolescent"[MeSH Terms] OR "adult"[MeSH Terms]))
```

**Database: EMBASE (From inception to December 31<sup>st</sup>, 2018)**

**Search Strategy:**

---

1. 'cerebrovascular accident'/exp OR 'cerebrovascular accident':ti,ab OR 'brain ischemia'/exp OR 'brain ischemia':ti,ab OR 'stroke':ti,ab (513281)
2. 'thrombophilia'/exp OR 'thrombophili\*':ti,ab OR 'inherited thrombophilia'/exp OR 'inherited thrombophilia':ti,ab OR 'genetic polymorphis\*':ti,ab (45868)
3. 'blood clotting factor 5'/exp OR 'blood clotting factor 5 leiden'/exp OR 'factor v leiden':ti,ab OR 'activated protein c resistance'/exp OR 'activated protein c resistance':ti,ab (15829)
4. 'prothrombin'/exp OR (prothrombin NEAR/2 mutation):ti,ab (21764)
5. 'protein c deficiency'/exp OR 'protein c deficiency':ti,ab (3310)
6. 'protein s deficiency'/exp OR 'protein s deficiency':ti,ab (3066)
7. 'antithrombin deficiency'/exp OR 'antithrombin deficiency':ti,ab (2951)
8. 2 OR 3 OR 4 OR 5 OR 6 OR 7 (75736)
9. 1 AND 8 (4356)
10. #9 AND ([adolescent]/lim OR [adult]/lim OR [aged]/lim OR [middle aged]/lim OR [very elderly]/lim OR [young adult]/lim) AND [<1966-2018]/py AND [english]/lim NOT 'case report'/de (1300)

**EMBASE Query:**

('cerebrovascular accident'/exp OR 'cerebrovascular accident':ti,ab OR 'brain ischemia'/exp OR 'stroke':ti,ab) AND ('thrombophilia'/exp OR 'thrombophili\*':ti,ab OR 'inherited thrombophilia'/exp OR 'inherited thrombophilia':ti,ab OR 'genetic polymorphis\*':ti,ab OR 'blood clotting factor 5'/exp OR 'blood clotting factor 5 leiden'/exp OR 'factor v leiden':ti,ab OR 'activated protein c resistance'/exp OR 'activated protein c resistance':ti,ab OR 'prothrombin'/exp OR ((prothrombin NEAR/2 mutation):ti,ab) OR 'antithrombin deficiency'/exp OR 'antithrombin deficiency':ti,ab OR 'protein c deficiency'/exp OR 'protein c deficiency':ti,ab OR 'protein s deficiency'/exp OR 'protein s deficiency':ti,ab) AND ([adolescent]/lim OR [adult]/lim OR [aged]/lim OR [middle aged]/lim OR [very elderly]/lim OR [young adult]/lim) AND [<1966-2018]/py AND [english]/lim NOT 'case report'/de

**Database: Cochrane Library (From 1946 to December 31<sup>st</sup>, 2018)****Search Strategy:**

---

1. Stroke[MeSH] OR "brain ischemia"[MesH] OR stroke:ti,ab,kw OR "cerebrovascular accident":ti,ab,kw (52117)
2. Thrombophilia[MeSH] OR thrombophili\*:ti,ab,kw OR "inherited thrombophilia\*":ti,ab,kw (700)
3. Factor V"[MeSH] OR "Factor V Leiden":ti,ab,kw OR "activated protein C resistance"[MeSH](178)
4. Prothrombin[MeSH] OR "prothrombin mutation":ti,ab,kw (461)
5. Protein C deficiency[MesH] OR "protein C deficiency":ti,ab,kw (44)
6. Protein S deficiency[MeSH] OR "protein S deficiency":ti,ab,kw (30)
7. Antithrombin III Deficiency[MeSH] OR "antithrombin deficiency":ti,ab,kw (48)
8. 2 OR 3 OR 4 OR 5 OR 6 OR 7 (1189)
9. 1 AND 8 (70)
10. 9 limit to December 2018 (54)

**Table S1. Characteristics of Included Studies: Types of Thrombophilias, Numbers of Participants, and Study Population.**

| Reference         | Country | Study period | Types of thrombophilia tested |     |     |     |     | Number of cases/controls | Study population                                                                                                                                                                                                                                                                                                                                                                                                                                                                                                                                                                                                          | Control Identification                                                                                                                                                                                                                                    | Stroke diagnosis | Case-control matching for       |
|-------------------|---------|--------------|-------------------------------|-----|-----|-----|-----|--------------------------|---------------------------------------------------------------------------------------------------------------------------------------------------------------------------------------------------------------------------------------------------------------------------------------------------------------------------------------------------------------------------------------------------------------------------------------------------------------------------------------------------------------------------------------------------------------------------------------------------------------------------|-----------------------------------------------------------------------------------------------------------------------------------------------------------------------------------------------------------------------------------------------------------|------------------|---------------------------------|
|                   |         |              | FVL                           | PTM | PCD | PSD | ATD |                          |                                                                                                                                                                                                                                                                                                                                                                                                                                                                                                                                                                                                                           |                                                                                                                                                                                                                                                           |                  |                                 |
| Anadure 2017(1)   | India   | 2010-2014    | +                             |     |     |     |     | 120/120                  | Hospitalized stroke ward patients, National Institute of Mental Health and Neuro Sciences, Bangalore<br>Age 15-45<br>Partial or complete occlusion of common carotid, internal carotid and vertebral arteries/ anterior circulation strokes/ posterior circulation stroke/ occlusive disease of the large vessels of the brain on MRA or DSA<br><br>Exclude: Hemorrhagic stroke; stroke due to trauma, infection, or tumors; vessel dissection; CNS vasculitis; malignancy or blood dyscrasia; aortoarteritis; nephrotic syndrome; cardioembolic stroke; vascular malformations and aneurysms; immunocompromised patients | Unrelated healthy subjects                                                                                                                                                                                                                                | CT/MRI/MRA       | Age, sex                        |
| Aznar 2004(2)     | Spain   | NR           | +                             | +   |     |     |     | 49/294                   | Age 18-50<br>Unit of thrombophilia<br>Cryptogenic stroke without signs of atherosclerosis, heart disease, foramen ovale or vessel occlusive disease                                                                                                                                                                                                                                                                                                                                                                                                                                                                       | Healthy subjects from the same geographic area and ethnic background                                                                                                                                                                                      | CT/MRI           | Age, geographic area, ethnicity |
| Belvis 2006(3)    | Spain   | 2001-2004    | +                             | +   |     |     |     | 89/150                   | Stroke Unit, Hospital de la Santa Creu I Sant Pau, Barcelona<br>First-ever cryptogenic stroke by TOAST criteria<br><br>Exclude: Pregnancy and puerperal stage; TIA; strokes in other TOAST criteria                                                                                                                                                                                                                                                                                                                                                                                                                       | Previously published study in Barcelona population                                                                                                                                                                                                        | CT/MRI           | -                               |
| Bentolila 1997(4) | France  | 1993-1995    |                               | +   |     |     |     | 125/134                  | Age < 45<br>Non-transient arterial cerebral ischemia                                                                                                                                                                                                                                                                                                                                                                                                                                                                                                                                                                      | Young healthy white men and women without history of thrombosis                                                                                                                                                                                           | CT               | -                               |
| Biswas 2009(5)    | India   | NR           | +                             | +   | +   | +   |     | 120/120                  | Outpatient Departments and Wards of the Departments of Neurosciences and Hematology, All India Institute of Medical Sciences, New Delhi<br>Age <40 with acute ischemic stroke<br>Stroke of non-cardioembolic origin<br>Present within 4 weeks of onset<br>Of Northern Indian origin<br><br>Exclude: Cardioembolic stroke; past history of cardiovascular disease; on oral anticoagulants during the first sample collection; DM, hyperlipoproteinemia, cancer, sickle cell anemia, and liver disease                                                                                                                      | Apparently healthy hospital staffs and their relatives or from unrelated attendants of the patients<br><br>Exclude: Taking medication; history of surgery or trauma in the past 30 days; History of bleeding, thrombotic, or cardiac disorders; pregnancy | CT/MRI           | Age, sex                        |

| Reference           | Country        | Study period | Types of thrombophilia tested |     |     |     |     | Number of cases/controls | Study population                                                                                                                                                                                                                                                              | Control Identification                                                                                             | Stroke diagnosis    | Case-control matching for |
|---------------------|----------------|--------------|-------------------------------|-----|-----|-----|-----|--------------------------|-------------------------------------------------------------------------------------------------------------------------------------------------------------------------------------------------------------------------------------------------------------------------------|--------------------------------------------------------------------------------------------------------------------|---------------------|---------------------------|
|                     |                |              | FVL                           | PTM | PCD | PSD | ATD |                          |                                                                                                                                                                                                                                                                               |                                                                                                                    |                     |                           |
| Bolaman 2009(6)     | Turkey         | 2003-2004    | +                             | +   |     |     |     | 24/53                    | Department of Neurology, Adnan Menderes University, Aydin<br>Stroke from cerebral infarct                                                                                                                                                                                     | Healthy subjects                                                                                                   | CT/MRI              | -                         |
| Buyru 2005(7)       | Turkey         | NR           | +                             |     |     |     |     | 29/20                    | Exclude: cerebral venous thrombosis; previous thromboembolic events; cerebrovascular thromboembolic and hemorrhagic event; TIA, drug use to influence the coagulation pathways; age <45<br>Neurology Clinic, Haydarpaşa Numune Hospital, Istanbul<br>Ischemic stroke patients | Healthy subjects                                                                                                   | CT/MRI              | -                         |
| Catto 1995(8)       | United Kingdom | NR           | +                             |     |     |     |     | 386/247                  | Four acute-care hospitals in Leeds<br>Acute ischemic stroke by WHO definition                                                                                                                                                                                                 | Leeds blood transfusion service and general practitioners                                                          | WHO definition      | -                         |
| Celiker 2009(9)     | Turkey         | 2000-2003    | +                             | +   |     |     |     | 162/285                  | Neurology Department of Baskent University Hospital<br>Acute ischemic stroke                                                                                                                                                                                                  | Previously published study                                                                                         | MRI                 | -                         |
| Chatterjee 2013(10) | India          | NR           |                               | +   | +   | +   | +   | 52/52                    | Stroke Clinic, Department of Neurology, All India Institute of Medical Sciences, New Delhi<br>Age <45 with non-embolic arterial ischemic stroke                                                                                                                               | Healthy individuals                                                                                                | CT/MRI              | Age, sex                  |
| Chen 2003(11)       | Taiwan         | NR           |                               |     | +   | +   | +   | 104/35                   | Exclude: Cardioembolic, hemorrhagic stroke; systemic diseases (cancer, sickle cell anemia, vasculitis)<br>Non-cardiac cerebral ischemia                                                                                                                                       | Hospital employees, family of patients, or individuals asking for neurologic examination free of medical disorders | CT/MRI              | -                         |
| Cushman 1998(12)    | USA            | 1989-1990    | +                             |     |     |     |     | 149/482                  | Exclude: SLE; APS; collagen diseases; taking anticoagulants and hormonal drugs; TIA<br>Cardiovascular Health Study (Random sample of Medicare eligibility list)<br>Age ≥65<br>Development of stroke in participants free of baseline history of stroke                        | Cardiovascular Health Study                                                                                        | Review by committee | -                         |
| D'Amico 1998(13)    | Italy          | 1996-1997    | +                             |     | +   | +   |     | 31/124                   | C. Besta Neurological Institute, Milan and Ospedale L. Mandic<br>Age <45 with ischemic stroke                                                                                                                                                                                 | Healthy volunteer from staff<br>Age <45                                                                            | CT/MRI              | -                         |
| De Lucia 1999(14)   | Italy          | 1994-1995    | +                             |     | +   | +   | +   | 50/100                   | Ischemic stroke                                                                                                                                                                                                                                                               | Healthy subjects                                                                                                   | WHO definition      | Age, sex                  |
| Djordjevic 2012(15) | Serbia         | NR           | +                             | +   |     |     |     | 73/120                   | Young adults having cerebral infarcts                                                                                                                                                                                                                                         | Healthy blood donors                                                                                               | MRI                 | -                         |
| Egan 2000(16)       | USA            | 1997-1998    |                               | +   |     |     |     | 42/635                   | Oregon Health Sciences University Hospital<br>Age ≤55 with an arterial stroke                                                                                                                                                                                                 | Normal healthy individuals from Portland                                                                           | CT/MRI              | -                         |
| Erten 2015(17)      | Turkey         | 2007-2009    | +                             | +   |     |     |     | 212/238                  | Research and Training Hospital Neurology Clinic, Süleyman Demirel University<br>Ischemic stroke patients                                                                                                                                                                      | Individuals without history of stroke                                                                              | NR                  | Age, Sex                  |

| Reference              | Country   | Study period                        | Types of thrombophilia tested |     |     |     |     | Number of cases/controls | Study population                                                                                                                                                                                                           | Control Identification                                                                                                                                                                    | Stroke diagnosis         | Case-control matching for             |
|------------------------|-----------|-------------------------------------|-------------------------------|-----|-----|-----|-----|--------------------------|----------------------------------------------------------------------------------------------------------------------------------------------------------------------------------------------------------------------------|-------------------------------------------------------------------------------------------------------------------------------------------------------------------------------------------|--------------------------|---------------------------------------|
|                        |           |                                     | FVL                           | PTM | PCD | PSD | ATD |                          |                                                                                                                                                                                                                            |                                                                                                                                                                                           |                          |                                       |
| Eterovic 2007(18)      | Croatia   | 1999-2003                           | +                             | +   |     |     |     | 120/120                  | Department of Neurology, Clinical Hospital Split<br>First-time acute ischemic stroke<br><br>Exclude: Age >65, secondary hypercoagulability status, DM type 1, significant obstruction of carotid arteries                  | Persons attending regular checkups, blood donors, volunteer staffs without cerebrovascular disease                                                                                        | CT/MRI                   | Age, Sex, cardiovascular risk factors |
| Fan 2010(19)           | USA       | 1991-1994                           | +                             | +   |     |     |     | 156/5817                 | Second phase of The Third National Health and Nutrition Examination Survey (NHANES III)<br>Age ≥17 with self-reported stroke                                                                                               | Same population without self-reported stroke                                                                                                                                              | Interview                | -                                     |
| Favaretto 2012(20)     | Italy     | 2008-2011                           | +                             | +   | +   | +   | +   | 340/272                  | Angiology Unit, S. Orsola-Malpighi University Hospital<br>Stroke of unknown cause by TOAST criteria<br><br>Exclude: Large vessel, small vessel, cardioembolic stroke; stroke from multiple etiologies; neoplasia, dementia | Out-patients referred for varicose veins and/or early venous insufficiency in the legs without clinical indication of stroke<br>Exclude: ABI≤0.9; previous coronary event; neoplasia; DVT | CT/MRI                   | -                                     |
| Go 2003(21)            | USA       | 1996-1997                           | +                             |     |     |     |     | 137/214                  | Cohort from Anticoagulation and Risk Factors in Atrial Fibrillation (ATRIA) study<br>Ambulatory adults with nonvalvular AF<br>Patients<br>Ischemic stroke                                                                  | Same cohort with no prior hospitalization for ischemic stroke                                                                                                                             | ICD-9 with record review | Follow-up time                        |
| Haeusler 2012(22)      | Germany   | NR                                  | +                             | +   |     |     |     | 44/282                   | Stroke outpatient clinic<br>Cryptogenic stroke by TOAST criteria<br>Exclude: Age ≥55                                                                                                                                       | Healthy blood donors without vascular diseases                                                                                                                                            | CT/MRI                   | -                                     |
| Halbmayer 1998(23)     | Austria   | NR                                  | +                             | +   |     |     |     | 20/20                    | Unexplained juvenile stroke                                                                                                                                                                                                | Healthy subjects                                                                                                                                                                          | NR                       | Age, sex                              |
| Hamedani 2013(24)      | USA       | 1992-1996<br>2001-2003<br>2003-2007 | +                             |     |     |     |     | 830/907                  | Genetics of Early Onset Stroke (GEOS) study<br>First ischemic stroke<br>Age 15-49<br><br>Exclude: trauma; procedure; hemorrhage; CVST; infection; vasculitis                                                               | Baltimore-Washington area<br>Participants without history of stroke                                                                                                                       | Record review            | Age, region of residence              |
| Hankey 2001(25)        | Australia | 1996-1998                           | +                             | +   | +   | +   | +   | 219/205                  | A university teaching hospital in Western Australia<br>First-ever ischemic stroke                                                                                                                                          | Randomly selected from the Western Australian electoral roll                                                                                                                              | CT/MRI                   | Age, sex, postal code                 |
| Jerrard-Dunne 2003(26) | England   | NR                                  |                               |     | +   | +   | +   | 130/130                  | Stroke services in South London<br>Age ≤65<br>Acute ischemic stroke                                                                                                                                                        | Sampling of primary care lists in the same geographic area<br>Stroke-free individuals                                                                                                     | CT/MRI                   | Age, sex, ethnicity                   |
| Jiang 2014(27)         | USA       | 1992-1996<br>2001-2003<br>2003-2007 |                               | +   |     |     |     | 397/426                  | Genetics of Early Onset Stroke (GEOS) study<br>First ischemic stroke<br>Age 15-49<br><br>Exclude: trauma; procedure; hemorrhage; CVST; infection; vasculitis                                                               | Baltimore-Washington area<br>Participants without history of stroke                                                                                                                       | Record review            | Age, region of residence              |

| Reference               | Country        | Study period | Types of thrombophilia tested |     |     |     |     | Number of cases/controls | Study population                                                                                                                                                          | Control Identification                                                                                                                      | Stroke diagnosis | Case-control matching for |
|-------------------------|----------------|--------------|-------------------------------|-----|-----|-----|-----|--------------------------|---------------------------------------------------------------------------------------------------------------------------------------------------------------------------|---------------------------------------------------------------------------------------------------------------------------------------------|------------------|---------------------------|
|                         |                |              | FVL                           | PTM | PCD | PSD | ATD |                          |                                                                                                                                                                           |                                                                                                                                             |                  |                           |
| Juul 2002(28)           | Denmark        | 1991-1997    | +                             |     |     |     |     | 641/7907                 | The Copenhagen City Heart Study and Copenhagen University Hospital<br>Age 20-95<br>Ischemic stroke                                                                        | Control subjects from the Copenhagen City Heart Study free of MI, IS, and non-MI IHD                                                        | CT               | -                         |
| Kamberi 2016(29)        | Macedonia      | 2008-2010    | +                             | +   |     |     |     | 39/102                   | Neurology Department, Clinical Hospital, Tetovo<br>Age 18-90<br>First-ever ischemic stroke<br><br>Exclude: Renal failure; MI; recent inflammatory or immunologic disease. | Healthy subjects from local residents                                                                                                       | CT/MRI           | -                         |
| Karakus 2005(30)        | Turkey         | NR           | +                             | +   | +   | +   | +   | 21/81                    | Age < 50<br>Cerebral infarction                                                                                                                                           | Volunteer physicians and laboratory staff                                                                                                   | CT/MRI           | -                         |
| Karttunen 2003(31)      | Finland        | 1991-1998    | +                             | +   | +   | +   | +   | 58/104                   | Age 15-60<br>Ischemic brain infarction of undetermined cause and PFO                                                                                                      | Spouse, friend, or randomly selected controls from the population register of the hospital catchment area                                   | CT               | Age, sex                  |
| Kholodkova 2015(32)     | Ukraine        | NR           | +                             | +   |     |     |     | 122/40                   | Neurology Unit, Kyiv City Hospital<br>Acute ischemic stroke                                                                                                               | Healthy donors without previous history of stroke                                                                                           | CT/MRI           | -                         |
| Krajcoviechova 2015(33) | Czech Republic | 2009-2012    | +                             | +   |     |     |     | 423/614                  | Thomayer Hospital or Charles University Hospital<br>Age 18-81<br>First-ever acute ischemic stroke                                                                         | Participants of the Czech post-MONICA study residing in Prague East and Pilsen districts<br>Age 50-75<br>Free of vascular diseases          | CT/MRI           | -                         |
| Kumar 2017(34)          | India          | NR           | +                             |     |     |     |     | 250/250                  | All India Institute of Medical Sciences, New Delhi<br>Age 18-85, North Indian<br>Ischemic stroke within three years before recruitment                                    | Spouses, relatives or patients attending neurology department for treatment other than stroke<br>Age 18-85, North Indian<br>No prior stroke | CT               | Age, sex                  |
| Linnemann 2008(35)      | Germany        | 2000-2006    | +                             | +   | +   | +   | +   | 41/993                   | Patients with history of VTE registered in the MAISTHRO Database<br>Age 17-90 with ischemic stroke                                                                        | Same cohort without stroke                                                                                                                  | CT/MRI           | -                         |
| Longstreth 1998(36)     | USA            | 1991-1995    | +                             | +   |     |     |     | 41/382                   | King, Pierce, Snohomish counties, Washington<br>Women age 18-44<br>Diagnosed of first stroke                                                                              | Random-digit dialing<br>Same area<br>Healthy women age 18-44                                                                                | CT/MRI           | Age                       |
| Lopaciuk 2001(37)       | Poland         | 1996-1999    | +                             | +   |     |     |     | 100/238                  | Age ≤45<br>History of ischemic stroke without a cardiac embolic source                                                                                                    | Healthy blood donor and hospital staff                                                                                                      | CT/MRI           | -                         |
| Martinelli 2006(38)     | Italy          | 1994-2005    | +                             | +   |     |     |     | 105/293                  | Referred for thrombophilia screening at Thrombosis Center, University of Milan and IRCCS Maggiore Hospital<br>Caucasian women of fertile age                              | Partners and friends of patients                                                                                                            | CT/MRI           | -                         |

| Reference         | Country      | Study period | Types of thrombophilia tested |     |     |     |     | Number of cases/controls | Study population                                                                                                                                        | Control Identification                                                                                                                                                                                                      | Stroke diagnosis      | Case-control matching for |
|-------------------|--------------|--------------|-------------------------------|-----|-----|-----|-----|--------------------------|---------------------------------------------------------------------------------------------------------------------------------------------------------|-----------------------------------------------------------------------------------------------------------------------------------------------------------------------------------------------------------------------------|-----------------------|---------------------------|
|                   |              |              | FVL                           | PTM | PCD | PSD | ATD |                          |                                                                                                                                                         |                                                                                                                                                                                                                             |                       |                           |
| Mayer 1993(39)    | USA          | 1990-1991    |                               |     |     | +   |     | 94/94                    | First ischemic stroke<br>Columbia-Presbyterian Medical Center North Manhattan Stroke Study<br>Age >39<br>Residing in the Zip code of northern Manhattan | Caucasian women of fertile age without previous thrombosis<br>Patients admitted to the medicine and neurology services<br>Age >39 in same area<br>Exclude: Thrombosis; bleeding; renal/liver failure; malignancy; infection | NR                    | -                         |
| Mochan 2005(40)   | South Africa | NR           |                               |     |     | +   |     | 33/33                    | Chris Hani Baragwanath Hospital in Soweto<br>HIV-infected<br>Stroke with cerebral infarction                                                            | Inpatients of same hospital<br>HIV-infected<br>No cerebral infarction                                                                                                                                                       | CT                    | Age, sex, CD4 count       |
| Moskau 2010(41)   | Germany      | 1999-2000    | +                             | +   |     |     |     | 167/500                  | Of German descent<br>Ischemic stroke                                                                                                                    | Blood donors of German descent                                                                                                                                                                                              | CT/MRI                | -                         |
| Nagayama 1996(42) | Japan        | NR           | +                             |     |     |     |     | 106/37                   | Chronic ischemic stroke                                                                                                                                 | Patients with neurological diseases without vascular involvement                                                                                                                                                            | NR                    | -                         |
| Pahus 2016(43)    | Denmark      | 2004-2012    | +                             | +   | +   | +   | +   | 377/64631                | Center of Hemophilia and Thrombosis, Aarhus University Hospital<br>Age 18 - 50 referred to thrombophilia investigation<br>Ischemic stroke               | Previously published data of general western population                                                                                                                                                                     | WHO and record review | -                         |
| Pestana 2009(44)  | Venezuela    | 2005-2007    | +                             |     |     |     |     | 54/134                   | Banco Municipal de Sangre, Caracas<br>Stroke                                                                                                            | Randomly selected, unrelated, and apparently healthy subjects without personal and family history of vascular, arterial, or thromboembolic diseases                                                                         | CT                    | -                         |
| Petrovic 2003(45) | Slovenia     | NR           | +                             |     |     |     |     | 96/115                   | Acute cerebral infarction                                                                                                                               | General population in the same region<br>Exclude: History of CVD, CHD, PAD; carotid bruit                                                                                                                                   | CT/MRI                | -                         |
| Pezzini 2005(46)  | Italy        | 1997-2002    | +                             | +   |     |     |     | 163/158                  | Department of Neurology, University of Brescia, Brescia<br>Age <45<br>Admitted patients with first-ever ischemic stroke                                 | Staff of same hospital<br>No vascular diseases                                                                                                                                                                              | CT/MRI                | Age, sex                  |
| Pezzini 2007(47)  | Italy        | NR           | +                             | +   |     |     |     | 108/216                  | Department of Neurology, University of Brescia, Brescia<br>Age <45<br>Unselected, unrelated women admitted first-ever acute ischemic stroke             | Women from the staff of same hospital                                                                                                                                                                                       | CT/MRI                | Age, sex                  |



| Reference         | Country        | Study period | Types of thrombophilia tested |     |     |     |     | Number of cases/controls | Study population                                                                                                                                                                    | Control Identification                                                                                                                                           | Stroke diagnosis      | Case-control matching for                              |
|-------------------|----------------|--------------|-------------------------------|-----|-----|-----|-----|--------------------------|-------------------------------------------------------------------------------------------------------------------------------------------------------------------------------------|------------------------------------------------------------------------------------------------------------------------------------------------------------------|-----------------------|--------------------------------------------------------|
|                   |                |              | FVL                           | PTM | PCD | PSD | ATD |                          |                                                                                                                                                                                     |                                                                                                                                                                  |                       |                                                        |
| Press 1996(48)    | USA            | NR           | +                             |     |     |     |     | 161/367                  | Wards and clinics at Portland Veterans Affairs Medical Center and Oregon Health Sciences University<br>Acute ischemic stroke within 7 days of enrollment                            | Healthy elderly (N=54)<br>Stroke risk group (N=116)<br>Blood donors (N=197)                                                                                      | NR                    | -                                                      |
| Pullmann 2004(49) | Slovakia       | NR           | +                             | +   |     |     |     | 23/71                    | White SLE patients with thromboembolic stroke<br>Exclude: Hemorrhage; vasculitis                                                                                                    | SLE patients without CVA/CHD                                                                                                                                     | CT/MRI                | -                                                      |
| Ranellou 2015(50) | Greece         | NR           | +                             | +   |     |     |     | 51/70                    | Evangelismos General Hospital<br>Age 18-50<br>Ischemic stroke within 24 hour of onset<br>Native Greek<br><br>Exclude: Major systemic diseases; coagulopathy; anticoagulants; trauma | Healthy blood donors from the same area without history of stroke/thrombosis                                                                                     | CT/MRI                | Age                                                    |
| Ridker 1995(51)   | USA            | NR           | +                             |     |     |     |     | 209/704                  | Physicians' Health Study<br>Apparently healthy US male physicians<br>Age 40-84<br>Developed stroke during 10-year follow-up                                                         | Randomly selected participants from the same study<br>No cardiovascular disease at the time of event in cases                                                    | CT and record review  | Age, smoking status, time since randomization in study |
| Ridker 1999(52)   | USA            | NR           |                               | +   |     |     |     | 259/1774                 | Physicians' Health Study<br>Apparently healthy US male physicians<br>Age 40-84<br>Developed stroke during 10-year follow-up                                                         | Randomly selected participants from the same study<br>No cardiovascular disease during follow up                                                                 | CT and record review  | Age, smoking status                                    |
| Ripoll 1997(53)   | French         | NR           | +                             |     |     |     |     | 321/428                  | Age >65<br>Ischemic cerebrovascular events                                                                                                                                          | Age >65<br>No personal or familial history of CVA/CHD                                                                                                            | NR                    | -                                                      |
| Romdhane 2011(54) | Tunisia        | NR           |                               |     | +   | +   | +   | 20/54                    | Age <50<br>First non-cardioembolic ischemic stroke                                                                                                                                  | NR                                                                                                                                                               | NR                    | Age                                                    |
| Rubattu 2005(55)  | Italy          | 1998-2003    | +                             | +   |     |     |     | 294/286                  | Neurological Department, University of Sassari, Sardinia<br>Ischemic stroke                                                                                                         | Randomly selected patients admitted to the same hospital with vascular risk factors or history of cardiovascular disease<br><br>Exclude: Current or previous CVA | CT/MRI                | -                                                      |
| Rubattu 2005(56)  | Italy          | NR           | +                             | +   |     |     |     | 115/180                  | Neurological Institute, University La Sapienza, Rome<br>Age 15-45<br>First-ever ischemic stroke within the 8 weeks preceding the admission into the hospital                        | Healthy blood donors from the same center<br>No drug/OCP use<br>No family history of stroke                                                                      | CT/MRI                | Age                                                    |
| Sastry 2006(57)   | United Kingdom | 1993-1998    | +                             | +   | +   | +   | +   | 101/101                  | Hospitals in the North West and Mersey Regions, Manchester<br>Age 16-39 at the time of stroke<br>First ischemic stroke identified by ICD-9                                          | Age 16-39<br>Resides in Manchester<br><br>Exclude: History of cardiovascular                                                                                     | WHO and record review | Age, sex                                               |

| Reference          | Country     | Study period | Types of thrombophilia tested |     |     |     |     | Number of cases/controls | Study population                                                                                                                                                                                                                                                                          | Control Identification                                                                                                                          | Stroke diagnosis | Case-control matching for      |
|--------------------|-------------|--------------|-------------------------------|-----|-----|-----|-----|--------------------------|-------------------------------------------------------------------------------------------------------------------------------------------------------------------------------------------------------------------------------------------------------------------------------------------|-------------------------------------------------------------------------------------------------------------------------------------------------|------------------|--------------------------------|
|                    |             |              | FVL                           | PTM | PCD | PSD | ATD |                          |                                                                                                                                                                                                                                                                                           |                                                                                                                                                 |                  |                                |
| Shi 2008(58)       | China       | 2006-2007    | +                             |     |     |     |     | 97/99                    | Exclude: Surgery/injury within 10 weeks; malignancy<br>Neurological department, Beijing Tiantan Hospital<br>Age 18-45<br>Acute ischemic stroke                                                                                                                                            | disease; stroke; arterial thrombosis<br>Other departments of the Tiantan Hospital<br>Age 18-45<br>No cardiovascular or cerebrovascular diseases | CT/MRI           | Age, sex                       |
| Slooter 2005(59)   | Netherlands | 1990-2001    | +                             | +   |     |     |     | 193/767                  | Exclude: AF; hemorrhage<br>Nine participating Dutch hospitals<br>University Medical Center Utrecht<br>Women age 18-49<br>Hospitalized for a first ischemic stroke                                                                                                                         | Random-digit dialing<br>Women age 18-49<br>No history of CHD/CVD/PAD                                                                            | CT/MRI           | Age, residence, year of stroke |
| Smiles 2002(60)    | USA         | NR           |                               | +   |     |     |     | 182/453                  | Exclude: TIA; hemorrhagic stroke; CSVT; dissection; history of CHD/CVD; terminal illness; aphasia or cognitive impairment<br>Cardiovascular Health Study (Random sample of Medicare eligibility list)<br>Age ≥65 (free of clinical CVD at baseline)<br>Had stroke during 6-year follow up | Cardiovascular Health Study<br>Free of subclinical CVD group<br>African-American group<br>Population-based controls                             | CT               | -                              |
| Supanc 2014(61)    | Croatia     | 2009-2012    | +                             | +   |     |     |     | 155/150                  | Department of Neurology, Sestre milosrdnice University Hospital Center, Zagreb<br>Ischemic stroke<br>Age <55                                                                                                                                                                              | Subjects treated at Pain Clinic of same center<br>No history of vascular or thromboembolic disease                                              | CT/MRI           | Age, sex                       |
| Szolnoki 2003(62)  | Hungary     | 1998-2002    | +                             | +   |     |     |     | 867/743                  | Department of Neurology and Neurophysiology, Pandy Kalman County Hospital<br>Consecutive Hungarian patients<br>First acute ischemic stroke                                                                                                                                                | Randomly selected from local GP registers<br>Healthy Caucasian Hungarian<br>No evidence of stroke on CT/MRI                                     | MRI              | Age, sex                       |
| Tatarskyy 2010(63) | Ukraine     | 2008-2009    | +                             | +   |     |     |     | 183/188                  | Randomly selected from different regions in Ukraine<br>Survivor of ischemic stroke referred for rehabilitation                                                                                                                                                                            | I: General population of Ukraine<br>II: Healthy individuals age >65 without history of ischemic stroke                                          | NR               | -                              |
| They-They 2012(64) | Morocco     | 2008-2009    | +                             | +   |     |     |     | 91/182                   | University Hospital Center, Casablanca<br>Admitted for ischemic stroke                                                                                                                                                                                                                    | Presumably healthy blood donors                                                                                                                 | CT/MRI           | Age, sex, ethnicity            |
| Tupitsyna 2013(65) | Russia      | NR           | +                             | +   |     |     |     | 1450/817                 | Stroke patients from Russian and Ukrainian population                                                                                                                                                                                                                                     | Russian and Ukrainian population                                                                                                                | NR               | -                              |
| Voetsch 2000(66)   | Brazil      | 1996-1998    | +                             | +   |     |     |     | 153/225                  | University Hospitals of the State University of Campinas and the University of Sao Paulo<br>First cerebral ischemic event occurring at age 15-45<br>Absence of systemic disease or cancer                                                                                                 | Randomly selected hospital staffs                                                                                                               | CT/MRI           | Age, sex                       |

| Reference        | Country | Study period | Types of thrombophilia tested |     |     |     |     | Number of cases/controls | Study population                                                                                                                                                                                                             | Control Identification                                       | Stroke diagnosis | Case-control matching for |
|------------------|---------|--------------|-------------------------------|-----|-----|-----|-----|--------------------------|------------------------------------------------------------------------------------------------------------------------------------------------------------------------------------------------------------------------------|--------------------------------------------------------------|------------------|---------------------------|
|                  |         |              | FVL                           | PTM | PCD | PSD | ATD |                          |                                                                                                                                                                                                                              |                                                              |                  |                           |
| Wypasek 2009(67) | Poland  | NR           | +                             | +   |     |     |     | 100/107                  | Exclude: PCD, PSD, ATD; Antiphospholipid antibodies<br>PFO patients<br>Age <65<br>History of first-ever cryptogenic ischaemic stroke after a median of 8 (3–19) months before enrollment                                     | Apparently healthy white individuals                         | CT/MRI           | Age, sex                  |
| Zimba 2017(68)   | Zambia  | 2014-2015    |                               |     | +   | +   |     | 52/52                    | Exclude: Inflammatory states; cancer; AF; DM; valvular heart disease; CAD; carotid artery stenosis<br>In-patients and Out-patients at University Teaching Hospital, Lusaka<br><br>Age ≥18<br>HIV positive<br>Ischemic stroke | Same center<br>HIV positive patients without ischemic stroke | CT/MRI           | Age, sex, ethnicity       |

NR, not reported; FVL, Factor V Leiden; PTM, Prothrombin G20210A Mutation; PCD, Protein C Deficiency; PSD, Protein S Deficiency; ATD, Antithrombin Deficiency; CT, computed tomography; MRI, Magnetic Resonance Imaging; MRA Magnetic Resonance Angiogram; TIA, transient ischemic attack; DM, Diabetes Mellitus; WHO, World Health Organization; SLE, systemic lupus erythematosus; APS, antiphospholipid syndrome; PFO, patent foramen ovale; VTE, venous thromboembolism; CVD, cerebrovascular disease; CHD, coronary heart disease; CVA, cerebrovascular accidents; AF, atrial fibrillation; OCP, oral contraceptive pills; PAD; peripheral arterial disease; CSVt, cerebral venous sinus thrombosis; HIV, human immunodeficiency virus.

**Table S2. Characteristics of Included Studies: Demographic Data of Cases and Controls.**

| References                 | Mean Age, year<br>Cases/Controls                               | Male, %<br>Cases/Controls    | Cryptogenic<br>stroke in<br>cases, % | Ethnicity, %<br>Cases/Controls                                                | Diabetes, %<br>Cases/Controls | Hypertension, %<br>Cases/Controls | Dyslipidemia, %<br>Cases/Controls | Hormonal Drug<br>Use, %<br>Cases/Controls | Smoking, %<br>Cases/Controls |
|----------------------------|----------------------------------------------------------------|------------------------------|--------------------------------------|-------------------------------------------------------------------------------|-------------------------------|-----------------------------------|-----------------------------------|-------------------------------------------|------------------------------|
| Anadure 2017(1)            | 33/35                                                          | 93/93                        | NR                                   | NR/NR                                                                         | NR/NR                         | 13/NR                             | 33/NR                             | NR/NR                                     | 63/43*                       |
| Aznar 2004(2)              | 18-50 (Range)/NR                                               | NR/NR                        | 100                                  | NR/NR                                                                         | NR/NR                         | NR/NR                             | NR/NR                             | NR/NR                                     | NR/NR                        |
| Belvis 2006(3)             | 57/48                                                          | 60/45                        | 100                                  | NR/NR                                                                         | 17/2.7                        | 36/13                             | 38/14                             | 6/NR                                      | 51/37                        |
| Bentolila 1997(4)          | 41/34                                                          | 58/50                        | 44                                   | White 100/100                                                                 | NR/NR                         | NR/NR                             | NR/NR                             | 25/NR                                     | NR/NR                        |
| Biswas 2009(5)             | NR/NR                                                          | NR/NR                        | NR                                   | Indian 100/100                                                                | NR/NR                         | NR/NR                             | NR/NR                             | NR/NR                                     | NR/NR                        |
| Bolaman 2009(6)            | 64/59                                                          | 67/58                        | NR                                   | NR/NR                                                                         | 33/32                         | 63/60                             | 38/36                             | NR/NR                                     | 21/19                        |
| Buyru 2005(7)              | 67/61 (Median)                                                 | NR/NR                        | NR                                   | NR/NR                                                                         | 21/NR                         | 59/NR                             | NR/NR                             | NR/NR                                     | 10/NR                        |
| Catto 1995(8)              | 74/76 (Median)                                                 | NR/NR                        | NR                                   | NR/NR                                                                         | NR/NR                         | NR/NR                             | NR/NR                             | NR/NR                                     | NR/NR                        |
| Celiker 2009(9)            | 70/NR                                                          | 54/NR                        | 30                                   | NR/NR                                                                         | 27/NR                         | 65/NR                             | 39/NR                             | NR/NR                                     | NR/NR                        |
| Chatterjee<br>2013(10)     | 23/NR                                                          | 63/63                        | NR                                   | NR/NR                                                                         | NR/NR                         | NR/NR                             | NR/NR                             | NR/NR                                     | NR/NR                        |
| Chen 2003(11)              | 62/61                                                          | 68/69                        | NR                                   | NR/NR                                                                         | 28/0                          | 70/0                              | NR/NR                             | NR/NR                                     | NR/NR                        |
| Cushman 1998(12)           | 76/72                                                          | 48/37                        | NR                                   | NR/NR                                                                         | 39/16                         | 60/34                             | NR/NR                             | NR/NR                                     | 45/50                        |
| D'Amico 1998(13)           | 34/33                                                          | 65/32                        | NR                                   | NR/NR                                                                         | NR/NR                         | NR/NR                             | NR/NR                             | NR/NR                                     | NR/NR                        |
| De Lucia 1999(14)          | 35/NR                                                          | 76/NR                        | NR                                   | NR/NR                                                                         | NR/NR                         | NR/NR                             | 54/NR                             | 0/NR                                      | NR/NR                        |
| Djordjevic 2012(15)        | 40/39                                                          | 56/70                        | NR                                   | NR/NR                                                                         | NR/NR                         | NR/NR                             | NR/NR                             | NR/NR                                     | NR/NR                        |
| Egan 2000(16)              | 43/41                                                          | 52/49                        | NR                                   | NR/NR                                                                         | NR/NR                         | NR/NR                             | NR/NR                             | NR/NR                                     | NR/NR                        |
| Erten 2015(17)             | 66/62*                                                         | 52/45                        | 51                                   | NR/NR                                                                         | 30/24                         | 61/43*                            | 28/23                             | NR/NR                                     | 38/37                        |
| Eterovic 2007(18)          | 61/61 (Median)                                                 | 64/64                        | NR                                   | White 100/ 100                                                                | 30/30                         | 56/56                             | 32/32                             | NR/NR                                     | 38/38                        |
| Fan 2010(19)               | 68/44*                                                         | 44/48                        | NR                                   | White 82/82<br>Black 15/12<br>Hispanic 3/6                                    | NR/NR                         | NR/NR                             | NR/NR                             | NR/NR                                     | NR/NR                        |
| Favaretto 2012(20)         | 51/52.2                                                        | PFO 49<br>Non- PFO 46<br>/74 | 100                                  | White 100/100                                                                 | PFO 5<br>Non- PFO 3<br>/4     | PFO 14<br>Non- PFO 13<br>/20      | PFO 19<br>Non- PFO 23<br>/21.7    | PFO 12<br>Non- PFO 12<br>/0               | PFO 21<br>Non- PFO 24<br>/17 |
| Go 2003(21)                | 74/69*                                                         | 51/62*                       | NR                                   | White 80/84<br>Black 6/2<br>Hispanic 4/2<br>Native American 1/0<br>Others 4/9 | 20/14                         | 66/44*                            | NR/NR                             | NR/NR                                     | NR/NR                        |
| Haeusler 2012(22)          | 36/39 (Median)                                                 | 41/36                        | 100                                  | NR/NR                                                                         | 5/NR                          | 223/NR                            | 36/NR                             | NR/NR                                     | 40.9/NR                      |
| Halbmayer<br>1998(23)      | 39/39                                                          | 50/50                        | 100                                  | NR/NR                                                                         | NR/NR                         | NR/NR                             | NR/NR                             | NR/NR                                     | NR/NR                        |
| Hamedani<br>2013(24)       | 41/40*                                                         | 57/55                        | 50.4                                 | White 56/60<br>Black 44/40                                                    | 17/5*                         | 43/19*                            | NR/NR                             | 16/8*                                     | 41/28*                       |
| Hankey 2001(25)            | 66/67                                                          | 64/64                        | 20                                   | NR/NR                                                                         | 25/11*                        | 54/33*                            | 24/22                             | NR/NR                                     | 33/18*                       |
| Jerrard-Dunne<br>2003(26)  | White 53/54<br>Black Caribbean<br>57/56<br>Black African 53/55 | 62/50                        | NR                                   | White 39/39<br>Black Caribbean<br>39/39<br>Black African 23/23                | 26/10                         | 59/39                             | 49/42                             | NR/NR                                     | 40/23                        |
| Jiang 2014(27)             | 41/39*                                                         | 63/55*                       | NR                                   | White 100/100                                                                 | 11/2*                         | 32/16*                            | NR/NR                             | 23/11*                                    | 43/24*                       |
| Juul 2002(28)              | 63/56*                                                         | 61/43*                       | NR                                   | White >99/>99                                                                 | 14/3*                         | 46/17*                            | NR/NR                             | NR/NR                                     | 80/73*                       |
| Kamberi 2016(29)           | 63/49*                                                         | NR/NR                        | NR                                   | NR/NR                                                                         | NR/NR                         | NR/NR                             | NR/NR                             | NR/NR                                     | NR/NR                        |
| Karakus 2005(30)           | 40/42                                                          | 38/52                        | 100                                  | NR/NR                                                                         | 10/5                          | 33/1*                             | 43/43                             | NR/NR                                     | 38/22                        |
| Karttunen 2003(31)         | 44/45                                                          | 55/57                        | 100                                  | NR/NR                                                                         | 2/4                           | 16/13                             | NR/NR                             | 27/27                                     | 29/24                        |
| Kholodkova<br>2015(32)     | 73/NR                                                          | NR/NR                        | 0                                    | NR/NR                                                                         | NR/NR                         | NR/NR                             | NR/NR                             | NR/NR                                     | NR/NR                        |
| Krajcoviechova<br>2015(33) | 66/61*                                                         | 61/49*                       | 36                                   | NR/NR                                                                         | 30/10*                        | 87/58*                            | 93/86*                            | NR/NR                                     | 60/53*                       |

| References             | Mean Age, year<br>Cases/Controls | Male, %<br>Cases/Controls | Cryptogenic<br>stroke in<br>cases, % | Ethnicity, %<br>Cases/Controls                             | Diabetes, %<br>Cases/Controls | Hypertension, %<br>Cases/Controls | Dyslipidemia, %<br>Cases/Controls | Hormonal Drug<br>Use, %<br>Cases/Controls | Smoking, %<br>Cases/Controls |
|------------------------|----------------------------------|---------------------------|--------------------------------------|------------------------------------------------------------|-------------------------------|-----------------------------------|-----------------------------------|-------------------------------------------|------------------------------|
| Kumar 2017(34)         | 51/53                            | 81/81                     | NR                                   | North Indian<br>100/100                                    | 32/10*                        | 58/17*                            | 23/6*                             | NR/NR                                     | 39/27*                       |
| Linnemann<br>2008(35)  | 66/48 (Median)*                  | 56/38*                    | NR                                   | NR/NR                                                      | 15/6*                         | 56/25*                            | 46/19*                            | NR/NR                                     | 15/21                        |
| Longstreth<br>1998(36) | 37/38                            | 0/0                       | NR                                   | White 83/90<br>Black 6/2<br>Others 11/8                    | NR/NR                         | NR/NR                             | NR/NR                             | NR/NR                                     | NR/NR                        |
| Lopaciuk 2001(37)      | 38/33                            | 51/66                     | 55                                   | NR/NR                                                      | 20/NR                         | 42/NR                             | 35/NR                             | NR/NR                                     | 61/NR                        |
| Martinelli 2006(38)    | 35/35                            | 0/0                       | 52                                   | White 100/100                                              | NR/NR                         | 12/3*                             | 10/0*                             | NR/NR                                     | 27/21                        |
| Mayer 1993(39)         | 68/68                            | 48/40                     | 17.1                                 | White 14/21<br>Black 38/37<br>Hispanic 46/39<br>Others 2/2 | 30/18                         | 75/46*                            | NR/NR                             | NR/NR                                     | 48/36                        |
| Mochan 2005(40)        | NR/NR                            | NR/NR                     | NR                                   | Black 100/NR                                               | NR/NR                         | NR/NR                             | NR/NR                             | NR/NR                                     | NR/NR                        |
| Moskau 2010(41)        | 55/33*                           | 38/29*                    | 17                                   | White 100/100                                              | NR/NR                         | NR/NR                             | NR/NR                             | NR/NR                                     | NR/NR                        |
| Nagayama<br>1996(42)   | 40/55                            | 63/18                     | NR                                   | Japanese 100/100                                           | NR/NR                         | NR/NR                             | NR/NR                             | NR/NR                                     | NR/NR                        |
| Pahus 2016(43)         | 43/NR                            | 51/NR                     | NR                                   | NR/NR                                                      | 8/NR                          | 32/NR                             | 37/NR                             | 22/NR                                     | 50/NR                        |
| Pestana 2009(44)       | 39/39                            | 39/39                     | NR                                   | NR/NR                                                      | 2/2                           | 13/16                             | NR/NR                             | 13/10                                     | 14/21                        |
| Petrovic 2003(45)      | 62/63                            | 63/57                     | NR                                   | White 100/100                                              | 31/4*                         | 66/33*                            | NR/NR                             | NR/NR                                     | 44/25*                       |
| Pezzini 2005(46)       | 35/35                            | 52/54                     | 31                                   | White 100/100                                              | 3/3                           | 17/6*                             | 28/20*                            | NR/NR                                     | 47/25*                       |
| Pezzini 2007(47)       | 34/35                            | 0/0                       | 38                                   | White 100/100                                              | 0/2                           | 12/4*                             | 25/11*                            | 40/14                                     | 41/13*                       |
| Press 1996(48)         | 64/68                            | 91/80                     | NR                                   | NR/NR                                                      | 36/21                         | 72/64                             | 26/30                             | NR/NR                                     | 41/10                        |
| Pullmann 2004(49)      | 37/46                            | 4/1                       | NR                                   | White 100/100                                              | 18/16                         | 41/35                             | 51/37                             | NR/NR                                     | 24/25                        |
| Ranellou 2015(50)      | 37/38                            | 49/54                     | NR                                   | NR/NR                                                      | 2/0                           | 16/0*                             | 10/3                              | NR/NR                                     | 35/36                        |
| Ridker 1995(51)        | 63/60                            | 100/100                   | NR                                   | Predominantly<br>white/Predominantly<br>white              | 13/4                          | 36/17                             | 12/9                              | NR/NR                                     | 60/58                        |
| Ridker 1999(52)        | 60/59                            | 100/100                   | NR                                   | Predominantly<br>white/Predominantly<br>white              | 7/3*                          | 28/16*                            | 12/9*                             | NR/NR                                     | 56/57                        |
| Ripoll 1997(53)        | 66/NR                            | NR/NR                     | NR                                   | NR/NR                                                      | NR/NR                         | NR/NR                             | NR/NR                             | NR/NR                                     | NR/NR                        |
| Romdhane<br>2011(54)   | 37/NR                            | 55/NR                     | NR                                   | NR/NR                                                      | NR/NR                         | <1/NR                             | NR/NR                             | <1/NR                                     | <1/NR                        |
| Rubattu 2005(55)       | 75/73 (Median)*                  | 60/57                     | NR                                   | NR/NR                                                      | 24/29                         | 65/49*                            | 22/13*                            | NR/NR                                     | 41/38                        |
| Rubattu 2005(56)       | 36/35                            | 44/54                     | 12                                   | NR/NR                                                      | 2/0                           | 22/4*                             | 18/18                             | 44/Excluded                               | 57/49                        |
| Sastry 2006(57)        | 33/33                            | 43/43                     | NR                                   | NR/NR                                                      | 3/1                           | 21/8*                             | NR/NR                             | 16/16                                     | 47/41                        |
| Shi 2008(58)           | 39/39                            | 81/81                     | NR                                   | Asian 100/100                                              | 20/5*                         | 50/13*                            | NR/NR                             | NR/NR                                     | 72/42*                       |
| Slooter 2005(59)       | 39/40                            | 0/0                       | 0                                    | NR/NR                                                      | 4/1*                          | 32/6*                             | 8/3*                              | 52/36*                                    | 35/32                        |
| Smiles 2002(60)        | 76/72                            | 41/39                     | NR                                   | White 95/94<br>Black 5/5<br>Other 0/5                      | 24/14                         | 53/34                             | NR/NR                             | NR/NR                                     | 45/55                        |
| Supanc 2014(61)        | NR/NR                            | NR/NR                     | 36                                   | White 100/100                                              | 4/3                           | 37/19*                            | 63/53                             | NR/NR                                     | 45/24*                       |
| Szolnoki 2003(62)      | 61/60                            | 53/53                     | NR                                   | White 100/100                                              | 32/6*                         | 51/18*                            | NR/NR                             | NR/NR                                     | 33/11*                       |
| Tatarskyy 2010(63)     | 65/30*                           | 52/45                     | NR                                   | NR/NR                                                      | NR/NR                         | NR/NR                             | NR/NR                             | NR/NR                                     | NR/NR                        |
| They-They<br>2012(64)  | 49/46                            | 51/52                     | 6.6                                  | NR/NR                                                      | 18/9*                         | 51/10*                            | NR/NR                             | NR/NR                                     | 22/7*                        |
| Tupitsyna 2013(65)     | NR/NR                            | NR/NR                     | NR                                   | NR/NR                                                      | NR/NR                         | NR/NR                             | NR/NR                             | NR/NR                                     | NR/NR                        |
| Voetsch 2000(66)       | 33/34                            | 41/44                     | NR                                   | White 75/53<br>Black 25/47                                 | 5/NR                          | 39/NR                             | 31/NR                             | NR/NR                                     | 52/NR                        |
| Wypasek 2009(67)       | 43/44                            | 30/32                     | NR                                   | White 100/100                                              | NR/NR                         | NR/NR                             | NR/NR                             | NR/NR                                     | 19/34                        |

| References     | Mean Age, year<br>Cases/Controls | Male, %<br>Cases/Controls | Cryptogenic<br>stroke in<br>cases, % | Ethnicity, %<br>Cases/Controls | Diabetes, %<br>Cases/Controls | Hypertension, %<br>Cases/Controls | Dyslipidemia, %<br>Cases/Controls | Hormonal Drug<br>Use, %<br>Cases/Controls | Smoking, %<br>Cases/Controls |
|----------------|----------------------------------|---------------------------|--------------------------------------|--------------------------------|-------------------------------|-----------------------------------|-----------------------------------|-------------------------------------------|------------------------------|
| Zimba 2017(68) | 52/46*                           | 44/44                     | 13                                   | NR/NR                          | 15/6                          | 50/17*                            | 8/8                               | Excluded/Excluded                         | 4/4                          |

\* denotes significant difference; NR, not reported

**Table S3. Results of Included Studies: Factor V Leiden.**

| References              | Test Method               | Odds Ratio (95%CI)                                                                           | Number of All FVL (%)                                     |                 | Number of Homozygous FVL (%)                          |               | Number of Heterozygous FVL (%)                            |                 |
|-------------------------|---------------------------|----------------------------------------------------------------------------------------------|-----------------------------------------------------------|-----------------|-------------------------------------------------------|---------------|-----------------------------------------------------------|-----------------|
|                         |                           |                                                                                              | Cases                                                     | Controls        | Cases                                                 | Controls      | Cases                                                     | Controls        |
| Anadure 2017(1)         | PCR/RFLP                  | 3.10 (0.61-15.7; <i>P</i> = .15)                                                             | 6/120 (5)                                                 | 2/120 (1.7)     | 0/120 (0)                                             | 0/120 (0)     | 6/120 (5)                                                 | 2/120 (1.7)     |
| Aznar 2004(2)           | PCR/RFLP                  | 2.62 (0.43-13.95)                                                                            | 2/49 (4.1)                                                | 5/294 (1.7)     |                                                       |               |                                                           |                 |
| Belvis 2006(3)          | PCR                       | NR                                                                                           | 2/89 (2.2)                                                | 6/150 (4)       | 0/89 (0)                                              | 0/150 (0)     | 2/89 (2.2)                                                | 6/150 (4)       |
| Biswas 2009(5)          | PCR/RFLP                  | 10.8 (1.3-229.5; <i>P</i> = .005)                                                            | 10/120 (8.3)                                              | 1/120 (0.8)     | 4/120 (3.3)                                           | 0/120 (0)     | 6/120 (5)                                                 | 1/120 (0.8)     |
| Bolaman 2009(6)         | PCR                       | 0.431 (0.074-2.504; <i>P</i> > .05)                                                          | 2/24 (8.3)                                                | 2/53 (3.8)      | 0/24 (0)                                              | 0/53 (0)      | 2/24 (8.3)                                                | 2/53 (3.8)      |
| Buyru 2005(7)           | PCR/RFLP                  | NR                                                                                           | 1/29 (3.4)                                                | 0/20 (0)        | 1/29 (3.4)                                            | 0/20 (0)      | 0/29 (0)                                                  | 0/20 (0)        |
| Catto 1995(8)           | PCR/RFLP                  | NR                                                                                           | 16/386 (4.1)                                              | 14/247 (5.7)    | 0/386 (0)                                             | 0/247 (0)     | 16/386 (4.1)                                              | 14/247 (5.7)    |
| Celiker 2009(9)         | PCR/RFLP                  | NR                                                                                           | 21/162 (13)                                               | 28/285 (9.8)    | 1/162 (0.6)                                           | 0/285 (0)     | 20/162 (12.3)                                             | 28/285 (9.8)    |
| Cushman 1998(12)        | PCR                       | 0.76 (0.32-1.81)                                                                             | 8/149 (5.4)                                               | 34/482 (7.1)    | 0/149 (0)                                             | 0/482 (0)     | 8/149 (5.4)                                               | 34/482 (7.1)    |
| D'Amico 1998(13)        | PCR                       | NR                                                                                           | 5/31 (16.1)                                               | 4/124 (3.2)     | 0/31 (0)                                              | 0/124 (0)     | 5/31 (16.1)                                               | 4/124 (3.2)     |
| De Lucia 1999(14)       | PCR                       | NR                                                                                           | 11/50 (22)                                                | 2/100 (2)       | 2/50 (4)                                              | 0/100 (0)     | 9/50 (18)                                                 | 2/100 (2)       |
| Djordjevic 2012(15)     | PCR/RFLP                  | 1.45 (0.47-4.48)                                                                             | 6/73 (8.2)                                                | 7/120 (5.8)     |                                                       |               |                                                           |                 |
| Erten 2015(17)          | PCR/in situ hybridization | NR                                                                                           | 32/212 (15.1)                                             | 21/238 (8.8)    | 3/212 (1.4)                                           | 0/238 (0)     | 29/212 (13.7)                                             | 21/238 (8.8)    |
| Eterovic 2007(18)       | PCR/RFLP                  | NR ( <i>P</i> = .023)                                                                        | 10/120 (8.3)                                              | 3/120 (2.5)     | 0/120 (0)                                             | 0/120 (0)     | 10/120 (8.3)                                              | 3/120 (2.5)     |
| Fan 2010(19)            | PCR                       | 0.82 (0.29-2.34)                                                                             | 6/156 (3.8)                                               | 262/5817 (4.5)  |                                                       |               |                                                           |                 |
| Favaretto 2012(20)      | PCR                       | NR                                                                                           | 16/340 (4.7)<br>PFO: 3/136 (2.2)<br>Non-PFO: 13/204 (6.4) | 14/272 (5.1)    | 0/340 (0)<br>PFO: 0/136 (2.2)<br>Non-PFO: 0/204 (6.4) | 0/272 (0)     | 16/340 (4.7)<br>PFO: 3/136 (2.2)<br>Non-PFO: 13/204 (6.4) | 14/272 (5.1)    |
| Go 2003(21)             | PCR/RFLP                  | Crude OR 1.59 (0.58-4.36)<br>Adjusted OR for age and prior ischemic stroke: 1.81 (0.65-5.05) | 8/137 (5.8)                                               | 8/214 (3.7)     | 0/137 (0)                                             | 0/214 (0)     | 8/137 (5.8)                                               | 8/214 (3.7)     |
| Haeusler 2012(22)       | PCR                       | NR ( <i>P</i> = .073)                                                                        | 7/41 (17.1)                                               | 22/282 (7.8)    | 0/41 (0)                                              | 0/282 (0)     | 7/41 (17.1)                                               | 22/282 (7.8)    |
| Halbmayer 1998(23)      | PCR                       | NR ( <i>P</i> = 1.00)                                                                        | 1/20 (5)                                                  | 2/20 (10)       | 0/20 (0)                                              | 0/20 (0)      | 1/20 (5)                                                  | 2/20 (10)       |
| Hamedani 2013(24)       | SNP array                 | 1.00 (0.60-1.66; <i>P</i> = 1.00)                                                            | 30/830 (3.6)                                              | 34/907 (3.7)    |                                                       |               |                                                           |                 |
| Hankey 2001(25)         | PCR/RFLP                  | 2.1 (0.6-6.8)                                                                                | 10/219 (4.6)                                              | 4/205 (2)       |                                                       |               |                                                           |                 |
| Juul 2002(28)           | PCR/RFLP                  | Age-adjusted OR 0.92 (0.56-1.53)                                                             | 17/231 (7.4)                                              | 629/7907 (8)    | 1/231 (0.4)                                           | 17/7907 (0.2) | 16/231 (6.9)                                              | 612/7907 (7.7)  |
| Kamberi 2016(29)        | PCR/hybridization         | 1.15 (0.33-4.02; <i>P</i> = .83)                                                             | 3/39 (7.7)                                                | 9/102 (8.8)     | 0/39 (0)                                              | 0/102 (0)     | 3/39 (7.7)                                                | 9/102 (8.8)     |
| Karakus 2005(30)        | PCR                       | NR                                                                                           | 3/21 (14.3)                                               | 4/81 (4.9)      | 0/21 (0)                                              | 1/81 (1.2)    | 3/21 (14.3)                                               | 3/81 (3.7)      |
| Karttunen 2003(31)      | PCR                       | 7.8 (0.8-71.3)                                                                               | 4/57 (7)                                                  | 1/104 (1)       | 0/57 (0)                                              | 0/104 (0)     | 4/57 (7)                                                  | 1/104 (1)       |
| Kholodkova 2015(32)     | PCR                       | NR                                                                                           | 3/114 (2.6)                                               | 0/40 (0)        | 0/114 (0)                                             | 0/40 (0)      | 3/114 (2.6)                                               | 0/40 (0)        |
| Krajcoviechova 2015(33) | PCR                       | Multivariate adjusted OR 1.22 (0.74-2.00; <i>P</i> =.43)                                     | 44/423 (10.4)                                             | 53/614 (8.6)    | 2/423 (0.5)                                           | 2/614 (0.3)   | 42/423 (9.9)                                              | 51/614 (8.3)    |
| Kumar 2017(34)          | PCR                       | 1.80 (0.60-5.37; <i>P</i> =.29)                                                              | 9/250 (3.6)                                               | 5/250 (2)       | 0/250 (0)                                             | 0/250 (0)     | 9/250 (3.6)                                               | 5/250 (2)       |
| Linnemann 2008(35)      | PCR                       | 0.87 (0.42-1.79; <i>P</i> =.86)                                                              | 10/41 (24.4)                                              | 278/1020 (27.3) | 0/41 (0)                                              | 22/1020 (2.2) | 10/41 (24.4)                                              | 256/1020 (25.1) |
| Longstreth 1998(36)     | PCR/RFLP                  | 0 (0-2.5)                                                                                    | 0/40 (0)                                                  | 16/388 (4.1)    | 0/40 (0)                                              | 0/388 (0)     | 0/40 (0)                                                  | 16/388 (4.1)    |
| Lopaciuk 2001(37)       | PCR/RFLP                  | 0.7 (0.2-2.6)                                                                                | 3/100 (3)                                                 | 10/238 (4.2)    | 0/100 (0)                                             | 0/238 (0)     | 3/100 (3)                                                 | 10/238 (4.2)    |
| Martinelli 2006(38)     | NR ("DNA analysis")       | Crude OR 2.5 (0.8-7.5)<br>Adjusted OR for age 2.6 (0.8-8.0)                                  | 6/105 (5.7)                                               | 7/293 (2.4)     | 0/105 (0)                                             | 0/293 (0)     | 6/105 (5.7)                                               | 7/293 (2.4)     |
| Moskau 2010(41)         | PCR                       | NR ( <i>P</i> = .35)                                                                         | 11/167 (6.6)                                              | 30/500 (6)      | 1/167 (0.6)                                           | 1/500 (0.2)   | 10/167 (6)                                                | 29/500 (5.8)    |
| Nagayama 1996(42)       | PCR/RFLP                  | NR                                                                                           | 0/106 (0)                                                 | 0/37 (0)        | 0/106 (0)                                             | 0/37 (0)      | 0/106 (0)                                                 | 0/37 (0)        |

| References         | Test Method           | Odds Ratio (95%CI)                                                                           | Number of All FVL (%) |                | Number of Homozygous FVL (%) |              | Number of Heterozygous FVL (%) |                |
|--------------------|-----------------------|----------------------------------------------------------------------------------------------|-----------------------|----------------|------------------------------|--------------|--------------------------------|----------------|
|                    |                       |                                                                                              | Cases                 | Controls       | Cases                        | Controls     | Cases                          | Controls       |
| Pahus 2016(43)     | PCR                   | Homozygous 4.06 (0.86-36.51)<br>Heterozygous 1.02 (0.54-1.79)                                | 15/207 (7.2)          | 282/4188 (6.7) | 1/207 (0.5)                  | 5/4188 (0.1) | 14/207 (6.8)                   | 277/4188 (6.6) |
| Pestana 2009(44)   | PCR                   | 2.60 (0.52-12.98)                                                                            | 4/54 (7.4)            | 4/134 (3)      | 0/54 (0)                     | 0/134 (0)    | 4/54 (7.4)                     | 4/134 (3)      |
| Petrovic 2003(45)  | PCR                   | 1 (0.26-3.76; <i>P</i> = .97)                                                                | 4/96 (4.2)            | 5/115 (4.3)    | 1/96 (1)                     | 0/115 (0)    | 3/96 (3.1)                     | 5/115 (4.3)    |
| Pezzini 2005(46)   | PCR                   | 1.17 (0.35-3.92)                                                                             | 6/163 (3.7)           | 5/158 (3.2)    | 0/163 (0)                    | 0/158 (0)    | 6/163 (3.7)                    | 5/158 (3.2)    |
| Pezzini 2007(47)   | PCR                   | 1.10 (0.51-5.70)                                                                             | 5/108 (4.6)           | 6/216 (2.8)    | 0/108 (0)                    | 0/216 (0)    | 5/108 (4.6)                    | 6/216 (2.8)    |
| Press 1996(48)     | PCR                   | NR                                                                                           | 4/161 (2.5)           | 19/367 (5.2)   | 0/161 (0)                    | 0/367 (0)    | 4/161 (2.5)                    | 19/367 (5.2)   |
| Pullmann 2004(49)  | PCR                   | NR                                                                                           | 2/23 (8.7)            | 3/71 (4.2)     | 0/23 (0)                     | 0/71 (0)     | 2/23 (8.7)                     | 3/71 (4.2)     |
| Ranellou 2015(50)  | PCR/<br>hybridization | NR ( <i>P</i> = .20)                                                                         | 7/51 (13.7)           | 4/70 (5.7)     | 0/51 (0)                     | 0/70 (0)     | 7/51 (13.7)                    | 4/70 (5.7)     |
| Ridker 1995(51)    | PCR                   | Crude RR 0.7 (0.3-1.4; <i>P</i> =.3)<br>Multivariate adjusted RR 1.0 (0.4-2.2; <i>P</i> =.9) | 9/209 (4.3)           | 42/704 (6)     | 0/209 (0)                    | 0/704 (0)    | 9/209 (4.3)                    | 42/704 (6)     |
| Ripoll 1997(53)    | PCR                   | 1.7 (0.8-3.4)                                                                                | 17/321 (5.3)          | 14/428 (3.3)   | 0/321 (0)                    | 0/428 (0)    | 17/321 (5.3)                   | 14/428 (3.3)   |
| Rubattu 2005(55)   | PCR/RFLP              | NR ( <i>P</i> = .27)                                                                         | 5/294 (1.7)           | 2/286 (0.7)    | 0/294 (0)                    | 0/286 (0)    | 5/294 (1.7)                    | 2/286 (0.7)    |
| Rubattu 2005(56)   | PCR/RFLP              | NR                                                                                           | 4/115 (3.5)           | 10/180 (5.6)   | 1/115 (0.9)                  | 0/180 (0)    | 3/115 (2.6)                    | 10/180 (5.6)   |
| Sastry 2006(57)    | NR                    | 0.50 (0.15-1.66; <i>P</i> =.26)                                                              | 4/101 (4)             | 8/101 (7.9)    |                              |              |                                |                |
| Shi 2008(58)       | PCR/RFLP              | NR                                                                                           | 0/97 (0)              | 0/99 (0)       | 0/97 (0)                     | 0/99 (0)     | 0/97 (0)                       | 0/99 (0)       |
| Slooter 2005(59)   | PCR                   | Adjusted OR for age, index year, and residence: 1.8 (0.9-3.6)                                | 14/179 (7.8)          | 42/763 (5.5)   |                              |              |                                |                |
| Supanc 2014(61)    | PCR/RFLP              | 2.88 (1.01-8.20; <i>P</i> =.40)                                                              | 14/155 (9)            | 5/150 (3.3)    | 2/155 (1.3)                  | 0/150 (0)    | 12/155 (7.7)                   | 5/150 (3.3)    |
| Szolnoki 2003(62)  | PCR                   | NR                                                                                           | 72/867 (8.3)          | 49/743 (6.6)   | 3/867 (0.3)                  | 2/743 (0.3)  | 69/867 (8)                     | 47/743 (6.3)   |
| Tatarsky 2010(63)  | PCR/RFLP              | NR                                                                                           | 6/183 (3.3)           | 5/188 (2.7)    | 0/183 (0)                    | 1/188 (0.5)  | 6/183 (3.3)                    | 4/188 (2.1)    |
| They-They 2012(64) | PCR/RFLP              | NR                                                                                           | 0/91 (0)              | 0/182 (0)      | 0/91 (0)                     | 0/182 (0)    | 0/91 (0)                       | 0/182 (0)      |
| Tupitsyna 2013(65) | PCR                   | Russian: 0.9 (0.50-1.76)<br>Ukrainian: 1.9 (0.40-8.97)                                       | 42/1450 (2.9)         | 16/577 (2.8)   | 0/1450 (0)                   | 0/577 (0)    | 42/1450 (2.9)                  | 16/577 (2.8)   |
| Voetsch 2000(66)   | PCR/RFLP              | NR                                                                                           | 5/153 (3.3)           | 8/225 (3.6)    | 0/153 (0)                    | 0/225 (0)    | 5/153 (3.3)                    | 8/225 (3.6)    |
| Wypasek 2009(67)   | SNP analysis          | NR ( <i>P</i> = .22)                                                                         | 9/100 (9)             | 5/107 (4.7)    | 0/100 (0)                    | 0/107 (0)    | 9/100 (9)                      | 5/107 (4.7)    |

NR, not reported; FVL, Factor V Leiden; PCR, polymerase chain reaction; RFLP, restriction fragment length polymorphism; OR, Odds ratio; RR, risk ratio; CI, confidence interval; SNP, Single nucleotide polymorphisms.



**Table S4. Results of Included Studies: Prothrombin G20210A Mutation.**

| References              | Test Method               | Odds Ratio (95%CI)                                           | Number of All PTM (%)                                      |                  | Number of Homozygous PTM (%)                      |              | Number of Heterozygous PTM (%)                             |                  |
|-------------------------|---------------------------|--------------------------------------------------------------|------------------------------------------------------------|------------------|---------------------------------------------------|--------------|------------------------------------------------------------|------------------|
|                         |                           |                                                              | Cases                                                      | Controls         | Cases                                             | Controls     | Cases                                                      | Controls         |
| Aznar 2004(2)           | PCR/RFLP                  | 3.75 (1.05-13.34)                                            | 4/49 (8.2)                                                 | 7/294 (2.4)      |                                                   |              |                                                            |                  |
| Belvis 2006(3)          | PCR                       | NR                                                           | 3/89 (3.4)                                                 | 13/201 (6.5)     | 0/89 (0)                                          | 0/201 (0)    | 3/89(3.4)                                                  | 13/201 (6.5)     |
| Bentolila 1997(4)       | NR                        | NR                                                           | 8/125 (6.4)                                                | 5/134 (3.7)      | 0/125(0)                                          | 0/134 (0)    | 8/125 (6.4)                                                | 5/134 (3.7)      |
| Biswas 2009(5)          | PCR/RFLP                  | NR                                                           | 0/120 (0)                                                  | 0/120 (0)        | 0/120 (0)                                         | 0/120 (0)    | 0/120 (0)                                                  | 0/120 (0)        |
| Bolaman 2009(6)         | PCR                       | NR                                                           | 0/24 (0)                                                   | 0/53 (0)         | 0/24 (0)                                          | 0/53 (0)     | 0/24 (0)                                                   | 0/53 (0)         |
| Celiker 2009(9)         | PCR/RFLP                  | NR                                                           | 3/162 (1.9)                                                | 5/182 (2.7)      | 0/162 (0)                                         | 0/182 (0)    | 3/162 (1.9)                                                | 5/182 (2.7)      |
| Chatterjee 2013(10)     | PCR/RFLP                  | 1.00 (0.02-51.35; $P = 1$ )                                  | 0/52 (0)                                                   | 0/52 (0)         | 0/52(0)                                           | 0/52 (0)     | 0/52 (0)                                                   | 0/52 (0)         |
| Djordjevic 2012(15)     | PCR/RFLP                  | 1.33 (0.35-5.13)                                             | 4/73 (5.5)                                                 | 5/120 (4.2)      |                                                   |              |                                                            |                  |
| Egan 2000(16)           | NR                        | NR                                                           | 0/42 (0)                                                   | 13/635 (2)       | 0/42(0)                                           | 0/635 (0)    | 0/42 (0)                                                   | 13/635 (2)       |
| Erten 2015(17)          | PCR/in situ hybridization | NR                                                           | 13/212 (6.1)                                               | 10/238 (4.2)     | 0/212 (0)                                         | 0/238 (0)    | 13/212 (6.1)                                               | 10/238 (4.2)     |
| Eterovic 2007(18)       | PCR/RFLP                  | NR ( $P = .047$ )                                            | 9/120 (7.5)                                                | 3/120 (2.5)      | 0/120 (0)                                         | 0/120 (0)    | 9/120 (7.5)                                                | 3/120 (2.5)      |
| Fan 2010(19)            | PCR                       | 1.69 (0.26-10.82)                                            | 6/156 (3.8)                                                | 122/5817 (2.1)   |                                                   |              |                                                            |                  |
| Favaretto 2012(20)      | PCR                       | 2.97 (1.32-6.69)                                             | 29/340 (8.5)<br>PFO: 12/136 (8.8)<br>Non-PFO: 17/204 (8.3) | 9/272 (3.3)      | 0/340 (0)<br>PFO: 0/136 (0)<br>Non-PFO: 0/204 (0) | 0/272 (0)    | 29/340 (8.5)<br>PFO: 12/136 (8.8)<br>Non-PFO: 17/204 (8.3) | 9/272 (3.3)      |
| Haeusler 2012(22)       | PCR                       | NR ( $P = >.995$ )                                           | 1/38 (2.6)                                                 | 10/282 (3.5)     | 0/38 (0)                                          | 0/282 (0)    | 1/38 (2.6)                                                 | 10/282 (3.5)     |
| Halbmayer 1998(23)      | PCR                       | NR ( $P = .46$ )                                             | 2/20 (10)                                                  | 0/20 (0)         | 0/20 (0)                                          | 0/20 (0)     | 2/20 (10)                                                  | 0/20 (0)         |
| Hankey 2001(25)         | PCR                       | 1.9 (0.5-6.2)                                                | 8/219 (3.7)                                                | 4/205 (2)        |                                                   |              |                                                            |                  |
| Jiang 2014(27)          | PCR                       | 2.5 (0.9-6.5, $P = .07$ )                                    | 14/397 (3.5)                                               | 6/426 (1.4)      | 1/397(0.3)                                        | 0/426 (0)    | 13/397 (3.3)                                               | 6/426 (1.4)      |
| Kamberi 2016(29)        | PCR                       | 2.80 (0.33-23.53 $P = .32$ )                                 | 1/39 (2.6)                                                 | 7/102 (6.9)      | 0/39 (0)                                          | 0/102 (0)    | 1/39 (2.6)                                                 | 7/102 (6.9)      |
| Karakus 2005(30)        | PCR                       | NR                                                           | 1/21 (4.8)                                                 | 1/81 (1.2)       | 1/21 (4.8)                                        | 0/81 (0)     | 0/21 (0)                                                   | 1/81 (1.2)       |
| Karttunen 2003(31)      | PCR                       | 1.0 (1.0-1.1)                                                | 2/57 (3.5)                                                 | 0/104 (0)        | 0/57 (0)                                          | 0/104 (0)    | 2/57 (3.5)                                                 | 0/104 (0)        |
| Kholodkova 2015(32)     | PCR                       | NR                                                           | 6/114 (5.3)                                                | 0/40 (0)         | 0/114 (0)                                         | 0/40 (0)     | 6/114 (5.3)                                                | 0/40 (0)         |
| Krajcoviechova 2015(33) | PCR                       | Multivariate adjusted OR 2.29 (1.04-5.02, $P = .04$ )        | 22/423 (5.2)                                               | 15/614 (2.4)     | 1/423 (0.2)                                       | 0/614 (0)    | 21/423 (5)                                                 | 15/614 (2.4)     |
| Linnemann 2008(35)      | PCR                       | 0.63 (0.15-2.7, $P = .76$ )                                  | 2/41 (4.9)                                                 | 76/930 (8.2)     | 1/41 (2.4)                                        | 2/930 (0.2)  | 1/41 (2.4)                                                 | 74/930 (8)       |
| Longstreth 1998(36)     | PCR/RFLP                  | 1.6 (0.03-13.4)                                              | 1/41 (2.4)                                                 | 6/382 (1.6)      | 0/41 (0)                                          | 0/382 (0)    | 1/41 (2.4)                                                 | 6/382 (1.6)      |
| Lopaciuk 2001(37)       | PCR                       | 0.9 (0.2-5.0)                                                | 2/100 (2)                                                  | 5/238 (2.1)      | 0/100 (0)                                         | 0/238 (0)    | 2/100 (2)                                                  | 5/238 (2.1)      |
| Martinelli 2006(38)     | NR ("DNA analysis")       | Crude OR 0.9 (0.3-2.6)<br>Adjusted OR for age 0.9 (0.1-11.2) | 5/105 (4.8)                                                | 15/293 (5.1)     | 0/105 (0)                                         | 0/293 (0)    | 5/105 (4.8)                                                | 15/293 (5.1)     |
| Moskau 2010(41)         | PCR                       | NR ( $P = .88$ )                                             | 7/167 (4.2)                                                | 10/500 (2)       | 0/167 (0)                                         | 0/500 (0)    | 7/167 (4.2)                                                | 10/500 (2)       |
| Pahus 2016(43)          | PCR                       | Heterozygous 1.59 (0.32-4.81)                                | 3/92 (3.3)                                                 | 1377/64631 (2.1) | 0/92 (0)                                          | 8/64631 (0)  | 3/92 (3.3)                                                 | 1369/64631 (2.1) |
| Pezzini 2005(46)        | PCR                       | 2.68 (0.70-10.3)                                             | 9/163 (5.5)                                                | 3/158 (1.9)      | 1/163 (0.6)                                       | 0/158 (0)    | 8/163 (4.9)                                                | 3/158 (1.9)      |
| Pezzini 2007(47)        | PCR                       | 6.52 (1.73-24.6)                                             | 10/108 (9.3)                                               | 3/216 (1.4)      | 1/108 (0.9)                                       | 0/216 (0)    | 9/108 (8.3)                                                | 3/216 (1.4)      |
| Pullmann 2004(49)       | PCR                       | NR                                                           | 0/23 (0)                                                   | 3/71 (4.2)       | 0/23 (0)                                          | 0/71 (0)     | 0/23 (0)                                                   | 3/71 (4.2)       |
| Ranellou 2015(50)       | PCR                       | NR ( $P = .70$ )                                             | 7/51 (13.7)                                                | 4/70 (5.7)       | 0/51 (0)                                          | 0/70 (0)     | 7/51 (13.7)                                                | 4/70 (5.7)       |
| Ridker 1999(52)         | PCR                       | Crude RR 1.1 (0.6-2.1; $P = .8$ )                            | 11/259 (4.2)                                               | 69/1774 (3.9)    | 0/259(0)                                          | 1/1774 (0.1) | 11/259 (4.2)                                               | 68/1774 (3.8)    |

|                       |                 | Multivariate<br>adjusted RR<br>1.1 (0.5-2.4; $P=.7$ )                                                 |                 |                 |            |           |                 |                 |
|-----------------------|-----------------|-------------------------------------------------------------------------------------------------------|-----------------|-----------------|------------|-----------|-----------------|-----------------|
| Rubattu<br>2005(55)   | PCR/RFLP        | NR ( $P = .95$ )                                                                                      | 12/294<br>(4.1) | 12/286<br>(4.2) | 0/294 (0)  | 0/286 (0) | 12/294<br>(4.1) | 12/286<br>(4.2) |
| Rubattu<br>2005(56)   | PCR             | NR                                                                                                    | 8/115 (7)       | 10/180<br>(5.6) | 0/115 (0)  | 0/180 (0) | 8/115 (7)       | 10/180<br>(5.6) |
| Sastry<br>2006(57)    | NR              | NR                                                                                                    | 2/101 (2)       | 0/101 (0)       |            |           |                 |                 |
| Slooter<br>2005(59)   | PCR             | Adjusted OR for<br>age, index year,<br>and residence:<br>1.0 (0.3-3.0)                                | 5/188 (2.7)     | 18/763<br>(2.4) |            |           |                 |                 |
| Smiles<br>2002(60)    | PCR             | Crude OR 1.25<br>(0.46-3.39)<br>Adjusted OR for<br>sex, race, and<br>clinic site:<br>1.40 (0.51-3.86) | 6/182 (3.3)     | 12/453<br>(2.6) | 0/182(0)   | 0/453 (0) | 6/182 (3.3)     | 12/453<br>(2.6) |
| Supanc<br>2014(61)    | PCR             | 3.50 (0.72-17.24;<br>$P = .17$ )                                                                      | 7/155 (4.5)     | 2/150 (1.3)     | 0/155 (0)  | 0/150 (0) | 7/155 (4.5)     | 2/150 (1.3)     |
| Szolnoki<br>2003(62)  | PCR             | NR                                                                                                    | 5/867 (0.6)     | 4/743 (0.5)     | 0/867 (0)  | 0/743 (0) | 5/867 (0.6)     | 4/743 (0.5)     |
| Tatarsky<br>2010(63)  | PCR/RFLP        | NR                                                                                                    | 8/183 (4.4)     | 3/188 (1.6)     | 0/183 (0)  | 0/188 (0) | 8/183 (4.4)     | 3/188 (1.6)     |
| They-They<br>2012(64) | PCR/RFLP        | 2.3 (0.97-5.8; $P = .60$ )                                                                            | 11/91<br>(12.1) | 10/182<br>(5.5) | 0/91 (0)   | 0/182 (0) | 11/91<br>(12.1) | 10/182<br>(5.5) |
| Tupitsyna<br>2013(65) | PCR             | Russian: 0.7<br>(0.35-1.30)                                                                           | 29/1450 (2)     | 20/817<br>(2.4) | 0/1450 (0) | 0/817 (0) | 29/1450 (2)     | 20/817<br>(2.4) |
| Voetsch<br>2000(66)   | PCR/RFLP        | NR                                                                                                    | 7/153 (4.6)     | 5/229 (2.2)     | 0/153 (0)  | 0/229 (0) | 7/153 (4.6)     | 5/229 (2.2)     |
| Wypasek<br>2009(67)   | SNP<br>analysis | NR ( $P = .15$ )                                                                                      | 1/100 (1)       | 1/107 (0.9)     | 0/100 (0)  | 0/107 (0) | 1/100 (1)       | 1/107 (0.9)     |

NR, not reported; PTM, Prothrombin G20210A Mutation; PCR, polymerase chain reaction; RFLP, restriction fragment length polymorphism; OR, Odds ratio; RR, risk ratio; CI, confidence interval; SNP, Single nucleotide polymorphisms.

**Table S5. Results of Included Studies: Protein C Deficiency.**

| References             | Test Method                      | Definition of deficiency          | Timing of test after stroke                                                                                                  | Exclusion of anticoagulants | Odds Ratio (95%CI)                | Number of PCD (%) |               |
|------------------------|----------------------------------|-----------------------------------|------------------------------------------------------------------------------------------------------------------------------|-----------------------------|-----------------------------------|-------------------|---------------|
|                        |                                  |                                   |                                                                                                                              |                             |                                   | Cases             | Controls      |
| Biswas 2009(5)         | ELISA                            | <65%                              | 3-6 months after stroke                                                                                                      | Yes                         | NR                                | 4/120 (3.3)       | 0/120 (0)     |
| Chatterjee 2013(10)    | Clot-based assay                 | <70%                              | ≥4 months after stroke                                                                                                       | NR                          | 0.15 (0.01-1.30; <i>P</i> = .12)  | 6/52 (11.5)       | 1/52 (1.9)    |
| Chen 2003(11)          | Chromogenic assay                | <70%                              | NR (If a first test was abnormal, a second test was done 6 weeks later; a deficiency was defined by <70% in two tests)       | Yes                         | 5.29 (NR)                         | 14/104 (13.5)     | 1/35 (2.9)    |
| D'Amico 1998(13)       | NR                               | NR                                | 2-15 days after stroke                                                                                                       | NR                          | NR                                | 0/31 (0)          | 0/124 (0)     |
| De Lucia 1999(14)      | NR                               | <76.9% (<2.5th percentile)        | At 3 months after stroke                                                                                                     | Yes                         | NR                                | 2/50 (4)          | 1/100 (1)     |
| Favaretto 2012(20)     | Chromogenic assay                | <68%                              | 1 month after discharge                                                                                                      | NR                          | NR                                | 0/340 (0)         | 0/272 (0)     |
| Hankey 2001(25)        | Chromogenic assay                | <70%                              | Within 7 days and at 3-6 months (any low level is considered deficiency)                                                     | NR                          | 0.7 (0.2-3.1; <i>P</i> = .6)      | 3/219 (1.4)       | 4/205 (2)     |
| Jerrard-Dunne 2003(26) | Chromogenic assay                | <-2SD of ethnic-specific controls | First test at presentation<br>If abnormal, repeated test at ≥3 months after stroke<br>Results of the repeated test were used | Yes                         | 3.05 (0.60-15.39; <i>P</i> = .16) | 6/130 (4.6)       | 2/130 (1.5)   |
| Karakus 2005(30)       | Chromogenic assay                | NR                                | NR                                                                                                                           | NR                          | NR                                | 1/21 (4.8)        | 1/81 (1.2)    |
| Karttunen 2003(31)     | Chromogenic assay                | NR                                | >2 months after stroke                                                                                                       | NR                          | NR                                | 0/57 (0)          | 0/104 (0)     |
| Linnemann 2008(35)     | Chromogenic assay                | <74%                              | NR (a deficiency was defined by repeatedly low activity)                                                                     | Yes                         | 0.98 (0.97-0.99; <i>P</i> = 1.00) | 0/31 (0)          | 20/817 (2.4)  |
| Pahus 2016(43)         | Chromogenic and clot-based assay | <0.65 U/L (both assays)           | Average 2 months after stroke (Repeated in cases of deficiency)                                                              | NR                          | 1.90 (0.04-12.55)                 | 1/363 (0.3)       | 14/9648 (0.1) |
| Romdhane 2011(54)      | Chromogenic assay                | NR                                | NR                                                                                                                           | NR                          | 2 (NR; <i>P</i> = .6)             | 2/20 (10)         | 3/54 (5.6)    |
| Sastry 2006(57)        | Functional assay                 | NR                                | NR                                                                                                                           | Yes                         | NR                                | 1/86 (1.2)        | 0/101 (0)     |
| Zimba 2017(68)         | Chromogenic assay                | <70%                              | More than 48 hour, up to 1 month                                                                                             | Yes                         | NR ( <i>P</i> = .06)              | 5/52 (9.6)        | 0/52 (0)      |

NR, not reported; PCD, protein C Deficiency; ELISA, enzyme-linked immunosorbent assay; CI, confidence interval.

**Table S6. Results of Included Studies: Protein S Deficiency.**

| References             | Test Method                           | Definition of deficiency                                                                                 | Timing of test after stroke                                                                                                  | Exclusion of anticoagulants | Odds Ratio (95%CI)                | Number of PSD (%) |              |
|------------------------|---------------------------------------|----------------------------------------------------------------------------------------------------------|------------------------------------------------------------------------------------------------------------------------------|-----------------------------|-----------------------------------|-------------------|--------------|
|                        |                                       |                                                                                                          |                                                                                                                              |                             |                                   | Cases             | Controls     |
| Biswas 2009(5)         | ELISA                                 | <50%                                                                                                     | 3-6 months after stroke                                                                                                      | Yes                         | NR                                | 6/120 (5)         | 0/120 (0)    |
| Chatterjee 2013(10)    | Clot-based assay                      | <65%                                                                                                     | ≥4 months after stroke                                                                                                       | NR                          | 0.05 (0.01-0.38; <i>P</i> <.001)  | 15/52 (28.8)      | 1/52 (1.9)   |
| Chen 2003(11)          | Chromogenic assay                     | <60%                                                                                                     | NR (If a first test was abnormal, a second test was done 6 weeks later; a deficiency was defined by <60% in two tests)       | Yes                         | 2.86 (NR)                         | 22/104 (21.2)     | 3/35 (8.6)   |
| D'Amico 1998(13)       | NR                                    | NR                                                                                                       | 2-15 days after stroke (Repeated at >6 months after stroke; a deficiency was defined by abnormalities in both tests)         | NR                          | NR                                | 2/31 (6.5)        | 0/124 (0)    |
| De Lucia 1999(14)      | NR                                    | <74.6% (<2.5th percentile)                                                                               | At 3 months after stroke                                                                                                     | Yes                         | NR                                | 3/50 (6)          | 1/100 (1)    |
| Favaretto 2012(20)     | Chromogenic assay                     | <62%                                                                                                     | 1 month after discharge                                                                                                      | NR                          | NR                                | 0/340 (0)         | 0/272 (0)    |
| Hankey 2001(25)        | Immunoelectrophoresis                 | <55%                                                                                                     | Within 7 days and at 3-6 months (any low level is considered deficiency)                                                     | NR                          | 0.9 (0.1-6.7; <i>P</i> = .5)      | 2/219 (0.9)       | 2/205 (1)    |
| Jerrard-Dunne 2003(26) | Immunoassay                           | <-2SD of ethnic-specific controls                                                                        | First test at presentation<br>If abnormal, repeated test at ≥3 months after stroke<br>Results of the repeated test were used | Yes                         | 2.00 (0.36-11.1; <i>P</i> = .42)  | 4/130 (3.1)       | 2/130 (1.5)  |
| Karakus 2005(30)       | Immunoassay                           | NR                                                                                                       | NR                                                                                                                           | NR                          | NR                                | 1/21 (4.8)        | 0/81 (0)     |
| Karttunen 2003(31)     | Clot-based assay                      | NR                                                                                                       | >2 months after stroke                                                                                                       | NR                          | 1.0 (1.0-1.1)                     | 1/57 (1.8)        | 0/104 (0)    |
| Linnemann 2008(35)     | Clot-based assay                      | Male <70%, Female <60%                                                                                   | NR (a deficiency was defined by repeatedly low activity)                                                                     | Yes                         | 0.97 (0.13-7.39; <i>P</i> = 1.00) | 1/30 (3.3)        | 28/788 (3.6) |
| Mayer 1993(39)         | Free protein S: Immunoelectrophoresis | Free PS <20% of normal total PS                                                                          | Cases: Average 2.4 days after onset of stroke<br>Controls: Average 5.2 days after admission                                  | Yes                         | 1.1 (0.5-2.2)                     | 20/94 (21.3)      | 19/94 (20.2) |
| Mochan 2005(40)        | Clot-based assay                      | NR                                                                                                       | Cases: Repeated at 3 months after stroke<br>Controls: NR                                                                     | NR                          | NR                                | 11/33 (33.3)      | 12/33 (36.4) |
| Pahus 2016(43)         | Clot-based assay, ELISA               | Clot-based assay: <0.65 U/L<br>AND<br>Free PS<br>ELISA: <0.13 U/L (until 2005) and <0.55 U/L (from 2006) | Average 2 months after stroke (Repeated in cases of deficiency)                                                              | NR                          | 2.32 (0.24-11.27)                 | 2/364 (0.5)       | 9/3788 (0.2) |
| Romdhane 2011(54)      | Clot-based assay                      | NR                                                                                                       | NR                                                                                                                           | NR                          | 11.3 (NR; <i>P</i> = .003)        | 6/20 (30)         | 2/54 (3.7)   |
| Sastry 2006(57)        | Functional assay                      | NR                                                                                                       | NR                                                                                                                           | Yes                         | NR                                | 1/86 (1.2)        | 1/101 (1)    |
| Zimba 2017(68)         | Immunoassay                           | <60%                                                                                                     | More than 48 hour, up to 1 month                                                                                             | Yes                         | NR ( <i>P</i> = .42)              | 22/52 (42.3)      | 18/52 (34.6) |

NR, not reported; PSD, protein S Deficiency; ELISA, enzyme-linked immunosorbent assay; CI, confidence interval.

**Table S7. Results of Included Studies: Antithrombin Deficiency.**

| References             | Test Method       | Definition of deficiency          | Timing of test after stroke                                                                                                  | Exclusion of anticoagulants | Odds Ratio (95%CI)                | Number of ATD (%) |               |
|------------------------|-------------------|-----------------------------------|------------------------------------------------------------------------------------------------------------------------------|-----------------------------|-----------------------------------|-------------------|---------------|
|                        |                   |                                   |                                                                                                                              |                             |                                   | Cases             | Controls      |
| Chatterjee 2013(10)    | Chromogenic assay | <75%                              | ≥4 months                                                                                                                    | NR                          | 1.00 (0.02-51.35; <i>P</i> = 1)   | 0/52 (0)          | 0/52 (0)      |
| Chen 2003(11)          | Chromogenic assay | <70%                              | NR (If a first test was abnormal, a second test was done 6 weeks later; a deficiency was defined by <70% in two tests)       | Yes                         | 0.33 (NR)                         | 1/104 (1)         | 1/35 (2.9)    |
| De Lucia 1999(14)      | NR                | NR                                | 3 months                                                                                                                     | Yes                         | NR                                | 0/50 (0)          | 0/100 (0)     |
| Favaretto 2012(20)     | Chromogenic assay | <80%                              | 1 month after discharge                                                                                                      | NR                          | NR                                | 0/340 (0)         | 0/272 (0)     |
| Hankey 2001(25)        | Chromogenic assay | 82                                | Within 7 days and at 3-6 months (any low level is considered deficiency)                                                     | NR                          | 1.3 (0.5-3.3; <i>P</i> = .6)      | 11/21 (5.2)       | 8/205 (3.7)   |
| Jerrard-Dunne 2003(26) | Chromogenic assay | <-2SD of ethnic-specific controls | First test at presentation<br>If abnormal, repeated test at ≥3 months after stroke<br>Results of the repeated test were used | Yes                         | NR                                | 0/130 (0)         | 0/130 (0)     |
| Karakus 2005(30)       | Chromogenic assay | NR                                | NR                                                                                                                           | NR                          | NR                                | 1/21 (4.8)        | 0/81 (0)      |
| Karittunen 2003(31)    | Chromogenic assay | NR                                | >2 months after stroke                                                                                                       | NR                          | 0.9 (0.1-10.5)                    | 1/57 (1.8)        | 2/104 (1.9)   |
| Linnemann 2008(35)     | Chromogenic assay | <86%                              | NR (a deficiency was defined by repeatedly low activity)                                                                     | Yes                         | 0.88 (0.12-6.60, <i>P</i> = 1.00) | 1/40 (2.5)        | 29/993 (2.9)  |
| Pahus 2016(43)         | Functional assay  | <0.60 x 10 <sup>3</sup> U/L       | Average 2 months (Repeated in cases of deficiency)                                                                           | NR                          | NR                                | 0/288 (0)         | 16/9669 (0.2) |
| Romdhane 2011(54)      | Chromogenic assay | NR                                | NR                                                                                                                           | NR                          | 5.6 (NR; <i>P</i> = .01)          | 7/20 (35)         | 5/54 (9.3)    |
| Sastry 2006(57)        | Functional assay  | NR                                | NR                                                                                                                           | Yes                         | NR                                | 3/86 (3.5)        | 0/101 (0)     |

NR, not reported; ATD, Antithrombin Deficiency; CI, confidence interval.

**Table S8. Components of Quality Assessment.**

| References              | Research question | Study population | Target population and case representation | Sample size justification | Groups recruited from the same population | Inclusion and exclusion criteria prespecified and applied uniformly | Case and control definitions | Random selection of study participants | Concurrent controls | Exposure assessed prior to outcome measurement | Exposure measures and assessment | Blinding of exposure assessors | Statistical analysis | Study Quality |
|-------------------------|-------------------|------------------|-------------------------------------------|---------------------------|-------------------------------------------|---------------------------------------------------------------------|------------------------------|----------------------------------------|---------------------|------------------------------------------------|----------------------------------|--------------------------------|----------------------|---------------|
| Anadure 2017(1)         | Y                 | Y                | NR                                        | Y                         | CD                                        | CD                                                                  | Y                            | N                                      | N                   | N                                              | Y                                | NR                             | Y                    | Good          |
| Aznar 2004(2)           | Y                 | N                | NR                                        | N                         | Y                                         | Y                                                                   | Y                            | N                                      | N                   | N                                              | N                                | NR                             | N                    | Fair          |
| Belvis 2006(3)          | Y                 | Y                | NR                                        | N                         | N                                         | N                                                                   | Y                            | N                                      | N                   | N                                              | Y                                | Y                              | N                    | Fair          |
| Bentolila 1997(4)       | Y                 | Y                | NR                                        | N                         | CD                                        | Y                                                                   | Y                            | N                                      | N                   | N                                              | N                                | NR                             | N                    | Fair          |
| Biswas 2009(5)          | Y                 | N                | NR                                        | N                         | Y                                         | Y                                                                   | Y                            | N                                      | N                   | N                                              | N                                | NR                             | N                    | Fair          |
| Bolaman 2009(6)         | Y                 | N                | NR                                        | N                         | CD                                        | Y                                                                   | Y                            | N                                      | N                   | N                                              | Y                                | NR                             | N                    | Fair          |
| Buryu 2005(7)           | Y                 | N                | NR                                        | N                         | CD                                        | CD                                                                  | Y                            | N                                      | N                   | N                                              | Y                                | NR                             | N                    | Fair          |
| Catto 1995(8)           | Y                 | N                | NR                                        | N                         | Y                                         | CD                                                                  | Y                            | N                                      | N                   | N                                              | Y                                | NR                             | N                    | Fair          |
| Celiker 2009(9)         | Y                 | Y                | NR                                        | N                         | Y                                         | N                                                                   | Y                            | NA                                     | N                   | N                                              | Y                                | NR                             | N                    | Fair          |
| Chatterjee 2013(10)     | Y                 | N                | NR                                        | N                         | CD                                        | Y                                                                   | Y                            | N                                      | N                   | N                                              | N                                | NR                             | N                    | Fair          |
| Chen 2003(11)           | Y                 | N                | NR                                        | N                         | Y                                         | CD                                                                  | Y                            | N                                      | N                   | N                                              | Y                                | N                              | Y                    | Fair          |
| Cushman 1998(12)        | Y                 | Y                | NR                                        | N                         | Y                                         | Y                                                                   | Y                            | Y                                      | N                   | Y                                              | Y                                | NR                             | Y                    | Good          |
| D'Amico 1998(13)        | Y                 | Y                | NR                                        | N                         | Y                                         | Y                                                                   | Y                            | N                                      | N                   | N                                              | N                                | NR                             | N                    | Fair          |
| De Lucia 1999(14)       | Y                 | Y                | NR                                        | N                         | CD                                        | Y                                                                   | Y                            | N                                      | N                   | N                                              | N                                | Y                              | N                    | Fair          |
| Djordjevic 2012(15)     | Y                 | N                | NR                                        | N                         | Y                                         | Y                                                                   | Y                            | N                                      | N                   | N                                              | Y                                | NR                             | N                    | Fair          |
| Egan 2000(16)           | Y                 | Y                | NR                                        | N                         | Y                                         | CD                                                                  | Y                            | N                                      | N                   | N                                              | N                                | NR                             | N                    | Fair          |
| Erten 2015(17)          | Y                 | Y                | NR                                        | N                         | CD                                        | Y                                                                   | N                            | N                                      | N                   | N                                              | Y                                | NR                             | Y                    | Fair          |
| Eterovic 2007(18)       | Y                 | Y                | NR                                        | N                         | Y                                         | Y                                                                   | Y                            | N                                      | N                   | N                                              | Y                                | Y                              | Y                    | Good          |
| Fan 2010(19)            | Y                 | N                | NR                                        | N                         | Y                                         | Y                                                                   | N                            | NA                                     | N                   | CD                                             | Y                                | NR                             | Y                    | Fair          |
| Favaretto 2012(20)      | Y                 | Y                | NR                                        | N                         | Y                                         | N                                                                   | Y                            | N                                      | N                   | N                                              | Y                                | NR                             | Y                    | Fair          |
| Go 2003(21)             | Y                 | Y                | NR                                        | N                         | Y                                         | Y                                                                   | Y                            | NA                                     | N                   | N                                              | Y                                | NR                             | Y                    | Good          |
| Haeusler 2012(22)       | Y                 | N                | NR                                        | N                         | N                                         | N                                                                   | Y                            | N                                      | N                   | N                                              | Y                                | N                              | N                    | Fair          |
| Halbmayer 1998(23)      | Y                 | N                | NR                                        | N                         | CD                                        | CD                                                                  | N                            | N                                      | N                   | N                                              | Y                                | NR                             | N                    | Poor          |
| Hamedani 2013(24)       | Y                 | Y                | NR                                        | N                         | Y                                         | Y                                                                   | Y                            | Y                                      | N                   | N                                              | Y                                | NR                             | Y                    | Fair          |
| Hankey 2001(25)         | Y                 | Y                | NR                                        | N                         | Y                                         | Y                                                                   | Y                            | Y                                      | N                   | N                                              | Y                                | NR                             | Y                    | Good          |
| Jerrard-Dunne 2003(26)  | Y                 | N                | NR                                        | N                         | Y                                         | CD                                                                  | Y                            | Y                                      | N                   | N                                              | Y                                | NR                             | Y                    | Good          |
| Jiang 2014(27)          | Y                 | Y                | NR                                        | N                         | Y                                         | Y                                                                   | Y                            | Y                                      | N                   | N                                              | Y                                | NR                             | Y                    | Fair          |
| Juul 2002(28)           | Y                 | Y                | NR                                        | N                         | Y                                         | Y                                                                   | Y                            | NA                                     | N                   | Y                                              | Y                                | NR                             | Y                    | Fair          |
| Kamberi 2016(29)        | Y                 | Y                | NR                                        | N                         | Y                                         | Y                                                                   | Y                            | N                                      | N                   | N                                              | Y                                | NR                             | N                    | Fair          |
| Karakus 2005(30)        | Y                 | N                | NR                                        | N                         | Y                                         | Y                                                                   | N                            | Y                                      | N                   | N                                              | N                                | NR                             | N                    | Fair          |
| Karttunen 2003(31)      | Y                 | Y                | NR                                        | N                         | Y                                         | Y                                                                   | Y                            | Y                                      | N                   | N                                              | Y                                | Y                              | Y                    | Good          |
| Kholodkova 2015(32)     | Y                 | N                | NR                                        | N                         | Y                                         | Y                                                                   | Y                            | N                                      | N                   | N                                              | Y                                | NR                             | N                    | Fair          |
| Krajcoviechova 2015(33) | Y                 | Y                | NR                                        | Y                         | Y                                         | N                                                                   | Y                            | N                                      | N                   | N                                              | Y                                | NR                             | Y                    | Fair          |
| Kumar 2017(34)          | Y                 | N                | NR                                        | Y                         | Y                                         | Y                                                                   | Y                            | NA                                     | N                   | N                                              | Y                                | Y                              | Y                    | Good          |
| Linneman 2008(35)       | Y                 | Y                | NR                                        | N                         | Y                                         | Y                                                                   | Y                            | NA                                     | N                   | N                                              | Y                                | NR                             | Y                    | Good          |

| References          | Research question | Study population | Target population and case representation | Sample size justification | Groups recruited from the same population | Inclusion and exclusion criteria prespecified and applied uniformly | Case and control definitions | Random selection of study participants | Concurrent controls | Exposure assessed prior to outcome measurement | Exposure measures and assessment | Blinding of exposure assessors | Statistical analysis | Study Quality |
|---------------------|-------------------|------------------|-------------------------------------------|---------------------------|-------------------------------------------|---------------------------------------------------------------------|------------------------------|----------------------------------------|---------------------|------------------------------------------------|----------------------------------|--------------------------------|----------------------|---------------|
| Longstreth 1998(36) | Y                 | Y                | NR                                        | N                         | Y                                         | Y                                                                   | Y                            | Y                                      | N                   | N                                              | Y                                | Y                              | N                    | Good          |
| Lopaciuk 2001(37)   | Y                 | Y                | NR                                        | N                         | Y                                         | Y                                                                   | Y                            | N                                      | N                   | N                                              | Y                                | NR                             | N                    | Good          |
| Martinelli 2006(38) | Y                 | Y                | NR                                        | N                         | Y                                         | Y                                                                   | Y                            | N                                      | N                   | N                                              | N                                | NR                             | Y                    | Fair          |
| Mayer 1993(39)      | Y                 | Y                | NR                                        | N                         | Y                                         | Y                                                                   | CD                           | N                                      | N                   | N                                              | Y                                | NR                             | N                    | Fair          |
| Mochan 2005(40)     | Y                 | Y                | NR                                        | N                         | N                                         | N                                                                   | Y                            | NA                                     | N                   | N                                              | N                                | NR                             | N                    | Fair          |
| Moskau 2010(41)     | Y                 | N                | NR                                        | N                         | N                                         | CD                                                                  | Y                            | N                                      | N                   | N                                              | Y                                | NR                             | N                    | Fair          |
| Nagayama 1996(42)   | Y                 | N                | NR                                        | N                         | Y                                         | CD                                                                  | Y                            | N                                      | N                   | N                                              | Y                                | NR                             | N                    | Fair          |
| Pahus 2016(43)      | Y                 | Y                | NR                                        | N                         | N                                         | N                                                                   | Y                            | NA                                     | N                   | N                                              | N                                | Y                              | N                    | Fair          |
| Pestana 2009(44)    | Y                 | N                | NR                                        | N                         | Y                                         | Y                                                                   | Y                            | Y                                      | N                   | N                                              | Y                                | NR                             | Y                    | Fair          |
| Petrovic 2003(45)   | Y                 | N                | NR                                        | N                         | Y                                         | Y                                                                   | Y                            | N                                      | N                   | N                                              | Y                                | Y                              | Y                    | Fair          |
| Pezzini 2005(46)    | Y                 | Y                | NR                                        | N                         | Y                                         | Y                                                                   | Y                            | N                                      | N                   | N                                              | Y                                | NR                             | Y                    | Good          |
| Pezzini 2007(47)    | Y                 | Y                | NR                                        | Y                         | Y                                         | Y                                                                   | Y                            | N                                      | N                   | N                                              | Y                                | NR                             | Y                    | Good          |
| Press 1996(48)      | Y                 | N                | NR                                        | N                         | Y                                         | N                                                                   | N                            | N                                      | N                   | N                                              | Y                                | NR                             | N                    | Fair          |
| Pullmann 2004(49)   | Y                 | N                | NR                                        | N                         | Y                                         | Y                                                                   | Y                            | NA                                     | N                   | N                                              | Y                                | NR                             | Y                    | Fair          |
| Ranellou 2015(50)   | Y                 | N                | NR                                        | N                         | Y                                         | Y                                                                   | Y                            | N                                      | N                   | N                                              | Y                                | NR                             | N                    | Fair          |
| Ridker 1995(51)     | Y                 | Y                | NR                                        | N                         | Y                                         | Y                                                                   | Y                            | Y                                      | N                   | Y                                              | Y                                | NR                             | Y                    | Good          |
| Ridker 1999(52)     | Y                 | Y                | NR                                        | N                         | Y                                         | Y                                                                   | Y                            | Y                                      | N                   | Y                                              | Y                                | NR                             | Y                    | Good          |
| Ripoll 1997(53)     | Y                 | N                | NR                                        | N                         | CD                                        | CD                                                                  | N                            | N                                      | N                   | N                                              | Y                                | NR                             | N                    | Fair          |
| Romdhane 2011(54)   | Y                 | N                | NR                                        | N                         | CD                                        | CD                                                                  | CD                           | N                                      | N                   | N                                              | N                                | NR                             | N                    | Poor          |
| Rubattu 2005(55)    | Y                 | Y                | NR                                        | N                         | Y                                         | Y                                                                   | Y                            | Y                                      | N                   | N                                              | Y                                | Y                              | Y                    | Fair          |
| Rubattu 2005(56)    | Y                 | N                | NR                                        | N                         | Y                                         | N                                                                   | Y                            | N                                      | N                   | N                                              | Y                                | NR                             | Y                    | Fair          |
| Sastry 2006(57)     | Y                 | Y                | NR                                        | Y                         | Y                                         | Y                                                                   | Y                            | N                                      | N                   | N                                              | N                                | NR                             | Y                    | Fair          |
| Shi 2008(58)        | Y                 | Y                | NR                                        | N                         | Y                                         | Y                                                                   | Y                            | N                                      | N                   | N                                              | Y                                | NR                             | Y                    | Good          |
| Slooter 2005(59)    | Y                 | Y                | NR                                        | N                         | Y                                         | Y                                                                   | Y                            | Y                                      | N                   | N                                              | Y                                | Y                              | Y                    | Good          |
| Smiles 2002(60)     | Y                 | Y                | NR                                        | N                         | Y                                         | Y                                                                   | Y                            | NA                                     | N                   | Y                                              | Y                                | Y                              | Y                    | Good          |
| Supanc 2014(61)     | Y                 | Y                | NR                                        | N                         | Y                                         | Y                                                                   | Y                            | N                                      | N                   | N                                              | Y                                | NR                             | Y                    | Good          |
| Szolnoki 2003(62)   | Y                 | N                | NR                                        | N                         | Y                                         | Y                                                                   | Y                            | Y                                      | N                   | N                                              | Y                                | Y                              | Y                    | Good          |
| Tatarsky 2010(63)   | Y                 | N                | NR                                        | N                         | Y                                         | CD                                                                  | N                            | N                                      | N                   | N                                              | Y                                | NR                             | N                    | Fair          |
| They-They 2012(64)  | Y                 | Y                | NR                                        | N                         | Y                                         | Y                                                                   | Y                            | N                                      | N                   | N                                              | Y                                | N                              | Y                    | Good          |
| Tupitsyna 2013(65)  | Y                 | N                | NR                                        | N                         | Y                                         | CD                                                                  | N                            | N                                      | N                   | N                                              | Y                                | NR                             | N                    | Poor          |
| Voetsch 2000(66)    | Y                 | Y                | NR                                        | N                         | Y                                         | N                                                                   | Y                            | Y                                      | N                   | N                                              | Y                                | NR                             | N                    | Fair          |
| Wypasek 2009(67)    | Y                 | N                | NR                                        | N                         | NR                                        | Y                                                                   | Y                            | N                                      | N                   | N                                              | Y                                | NR                             | N                    | Fair          |
| Zimba 2017(68)      | Y                 | Y                | NR                                        | Y                         | Y                                         | Y                                                                   | Y                            | N                                      | N                   | N                                              | N                                | NR                             | Y                    | Good          |

Y, Yes; N, No; NR, not reported; CD, cannot determined; NA, not applicable

**Table S9. Additional sensitivity analyses.**

| <b>Types of studies that were excluded from the analysis</b>                                                                                                        | <b>Excluded studies</b>                       | <b>Thrombophilias</b> | <b>Pooled OR (95%CI)</b> | <b>I<sup>2</sup>,%</b> |
|---------------------------------------------------------------------------------------------------------------------------------------------------------------------|-----------------------------------------------|-----------------------|--------------------------|------------------------|
| Studies with enriched case population (those who were referred for thrombophilia testing because of a clinical indication or recruited from a thrombophilia center) | Aznar 2004, Martinelli 2006, Pahus 2016       | FVL                   | 1.24 (1.07, 1.44)        | 0                      |
|                                                                                                                                                                     |                                               | PTM                   | 1.47 (1.21, 1.77)        | 0                      |
|                                                                                                                                                                     |                                               | PCD                   | 2.17 (1.15, 4.11)        | 0                      |
|                                                                                                                                                                     |                                               | PSD                   | 2.30 (1.36, 4.07)        | 13.2                   |
|                                                                                                                                                                     |                                               | ATD                   | 1.37 (0.59, 2.94)        | 6.8                    |
| Studies that used self-reported history of stroke rather than imaging to define cases                                                                               | Fan 2010                                      | FVL                   | 1.26 (1.09, 1.47)        | 0                      |
|                                                                                                                                                                     |                                               | PTM                   | 1.47 (1.20, 1.80)        | 0                      |
| Studies that were rated as poor quality                                                                                                                             | Halbmayer 1998, Romdhane 2011, Tupitsyna 2013 | FVL                   | 1.26 (1.09, 1.48)        | 0                      |
|                                                                                                                                                                     |                                               | PTM                   | 1.53 (1.26, 1.86)        | 0                      |
|                                                                                                                                                                     |                                               | PCD                   | 2.16 (1.14, 4.09)        | 0                      |
|                                                                                                                                                                     |                                               | PSD                   | 2.01 (1.22, 3.48)        | 0                      |
|                                                                                                                                                                     |                                               | ATD                   | 0.91 (0.38, 1.97)        | 0                      |
| Studies that included cases of recurrent ischemic stroke                                                                                                            | Chatterjee 2013, Kumar 2017, They-They 2012   | FVL                   | 1.24 (1.08, 1.45)        | 0                      |
|                                                                                                                                                                     |                                               | PTM                   | 1.46 (1.20, 1.78)        | 0                      |
|                                                                                                                                                                     |                                               | PCD                   | 1.93 (1.01, 3.60)        | 0                      |
|                                                                                                                                                                     |                                               | PSD                   | 1.88 (1.19, 3.20)        | 0                      |
|                                                                                                                                                                     |                                               | ATD                   | 1.33 (0.59, 2.76)        | 8.0                    |

FVL, Factor V Leiden; PTM, Prothrombin G20210A Mutation; PCD, Protein C Deficiency; PSD, Protein S Deficiency; ATD, Antithrombin Deficiency; CI, confidence interval



Figure S1. Forest plot showing pooled odds ratio for Factor V Leiden.

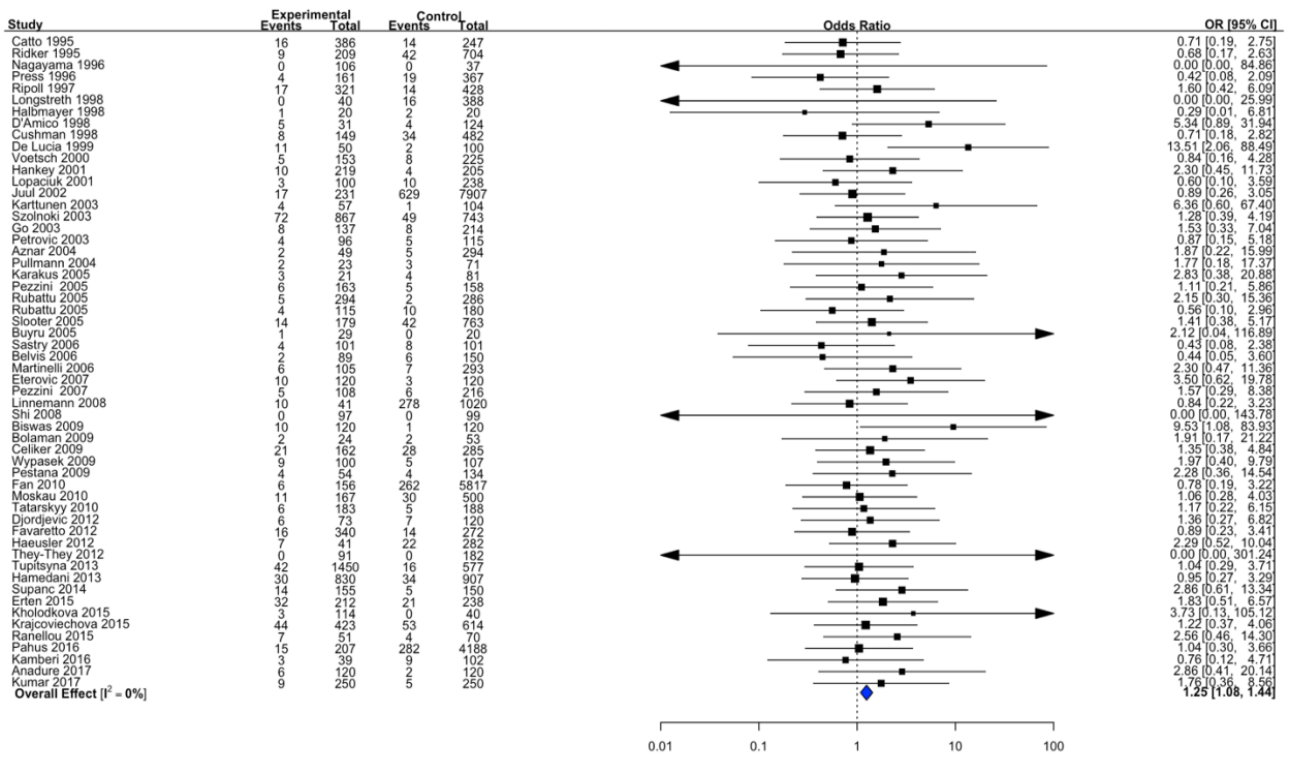

Figure S2. Forest plot showing pooled odds ratio for Factor V Leiden (Homozygous).

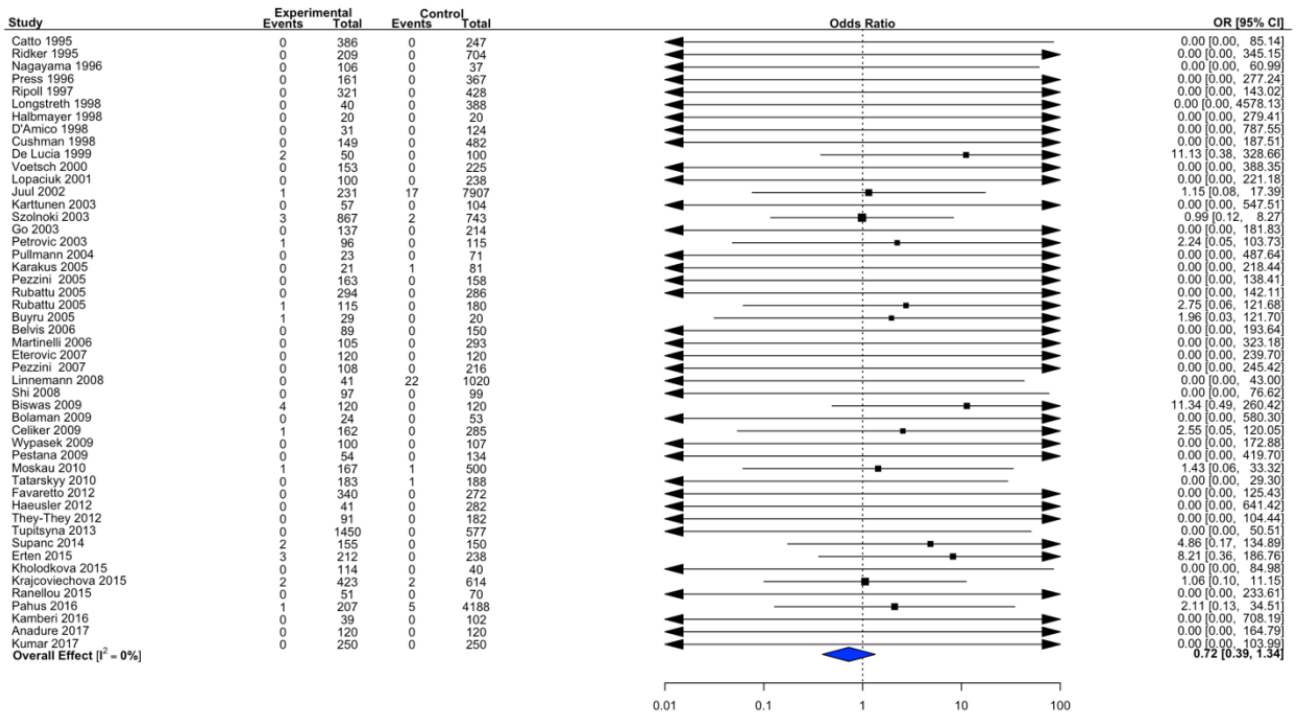

Figure S3. Forest plot showing pooled odds ratio for Factor V Leiden (Heterozygous).

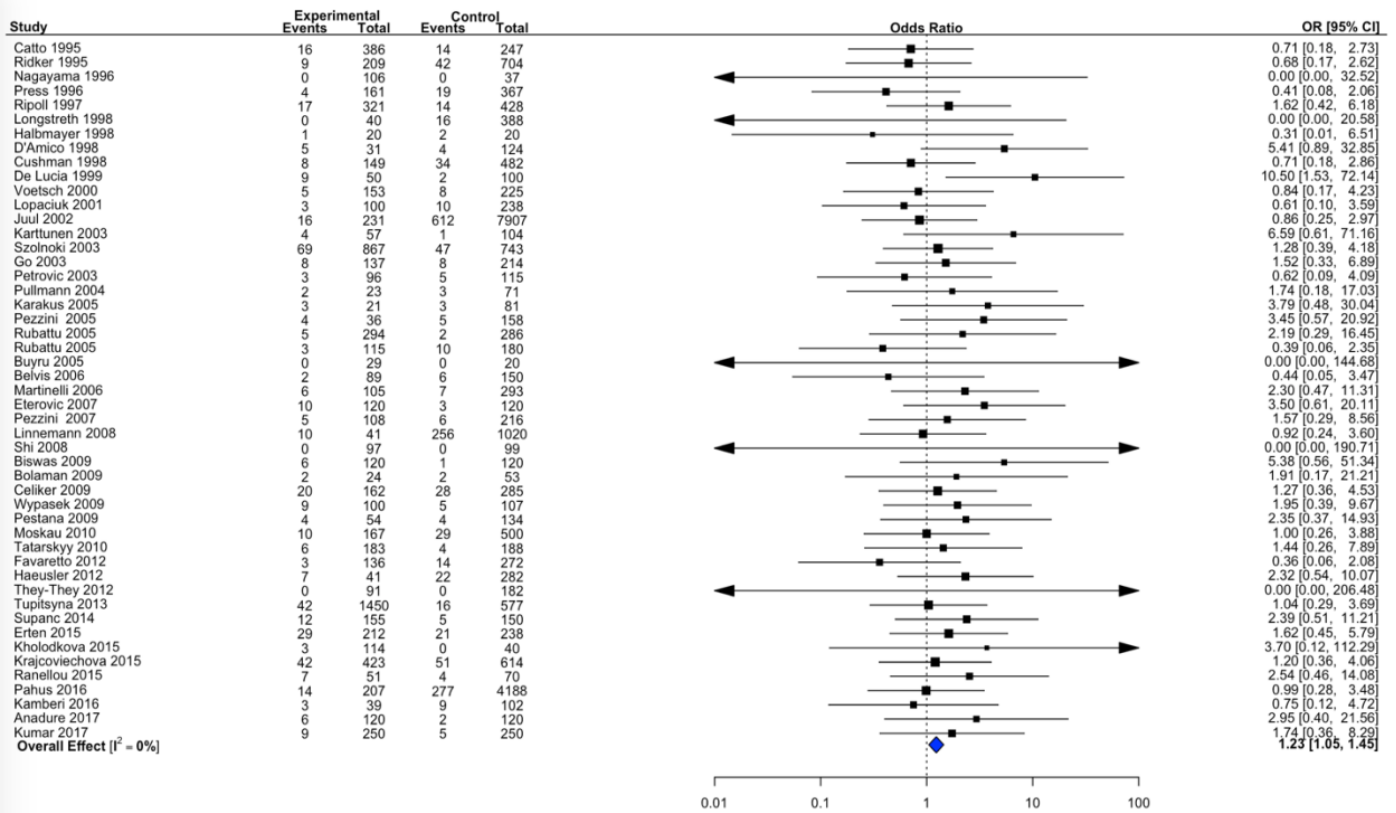

Figure S4. Funnel plot of included studies.

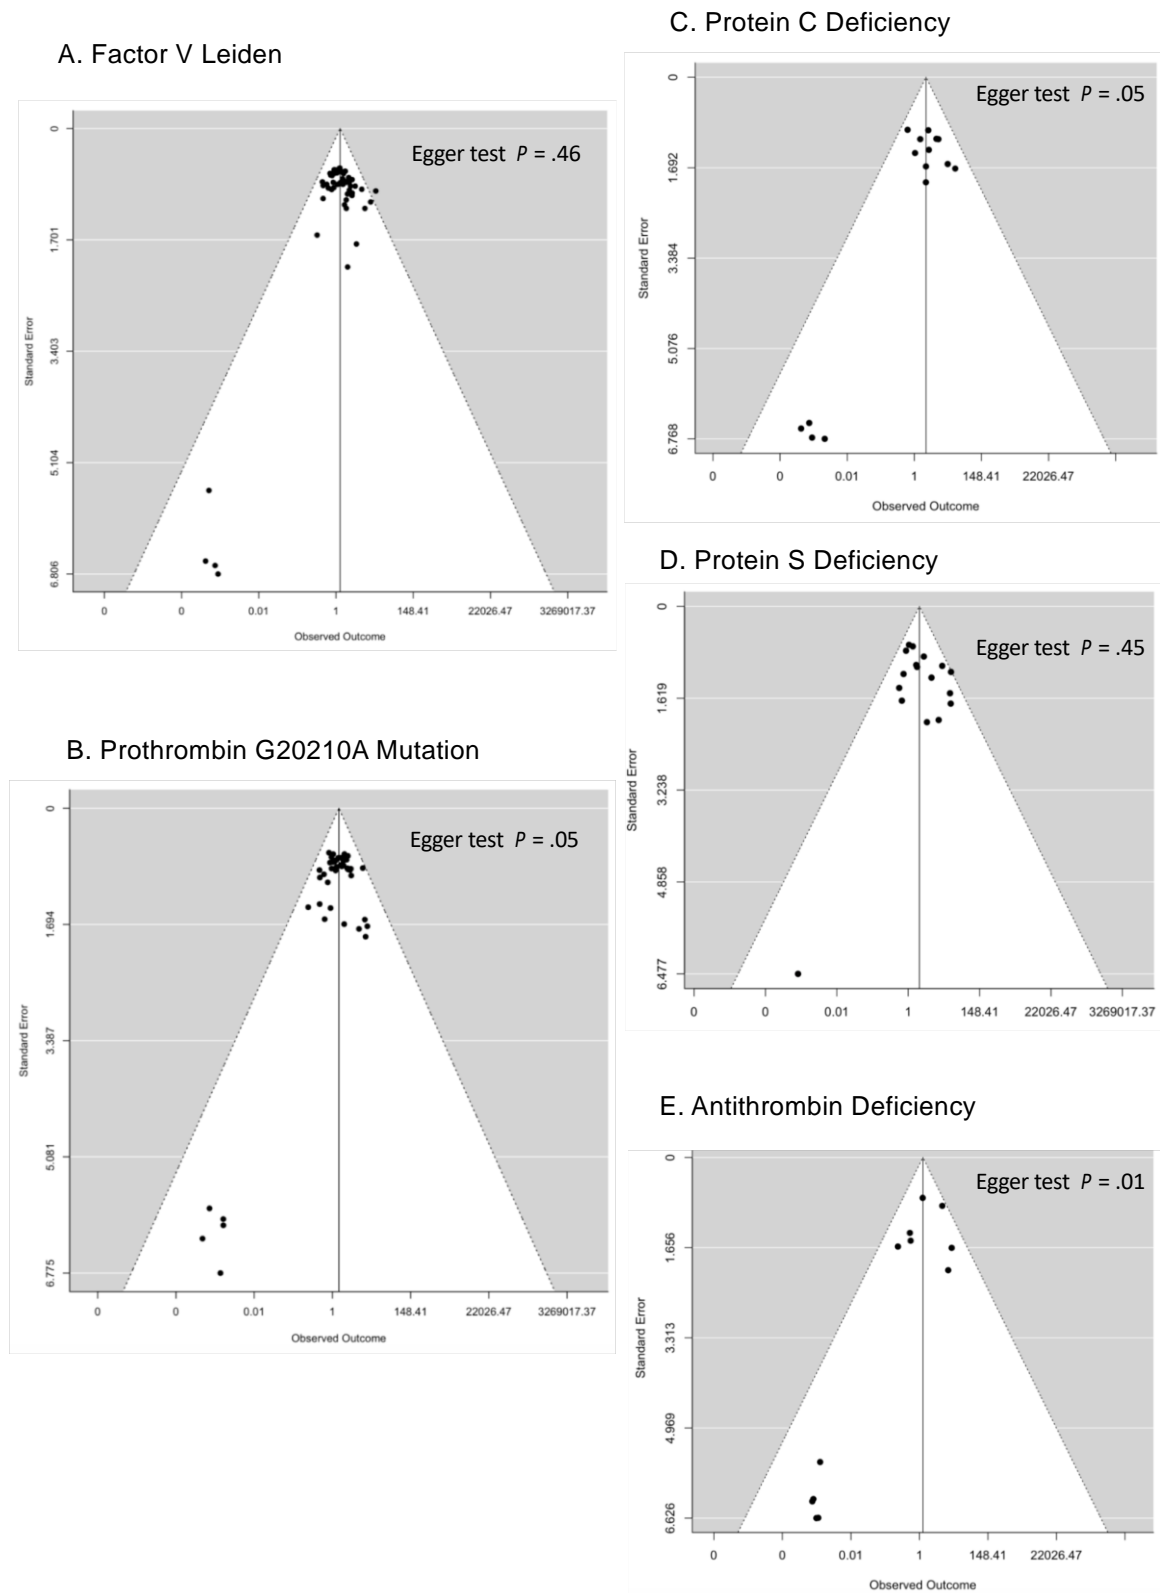

Figure S5. Forest plot showing pooled odds ratio for Prothrombin G20210A Mutation.

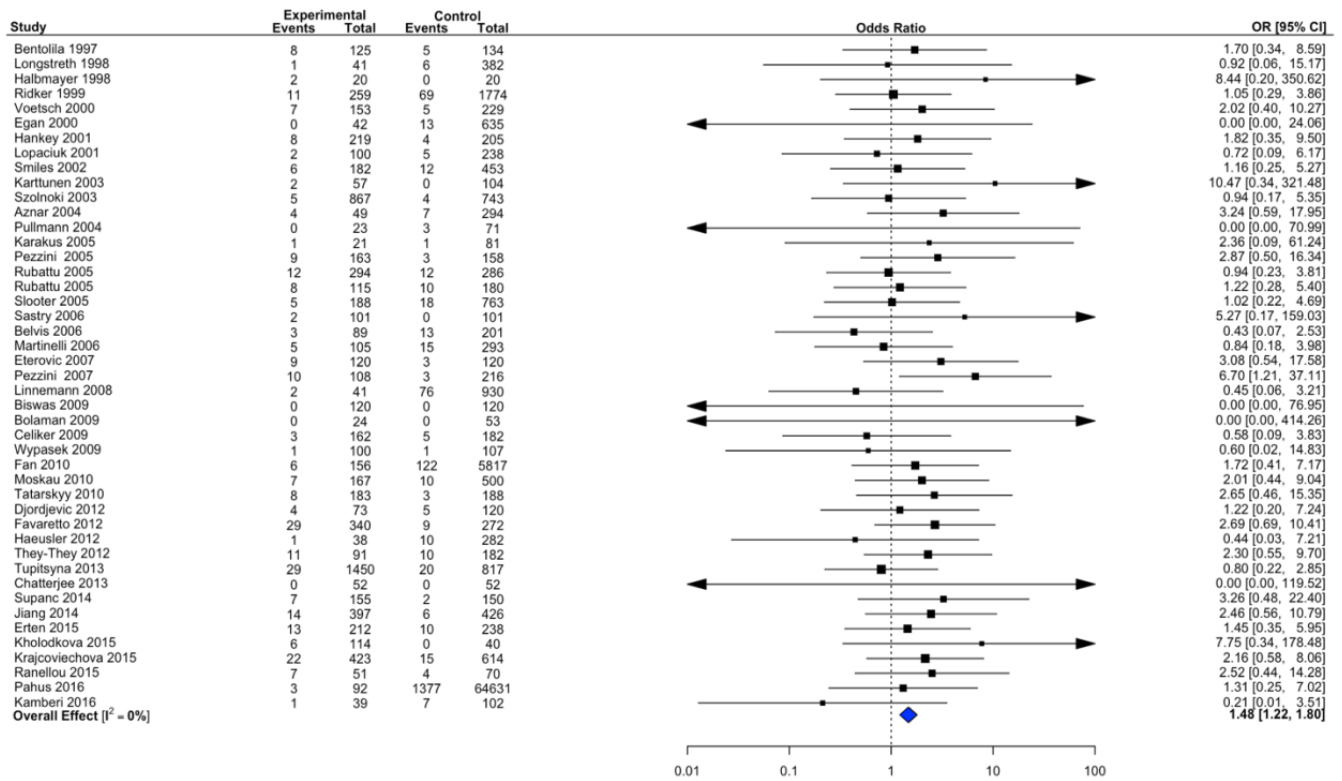

Figure S6. Forest plot showing pooled odds ratio for Prothrombin G20210A Mutation (Homozygous).

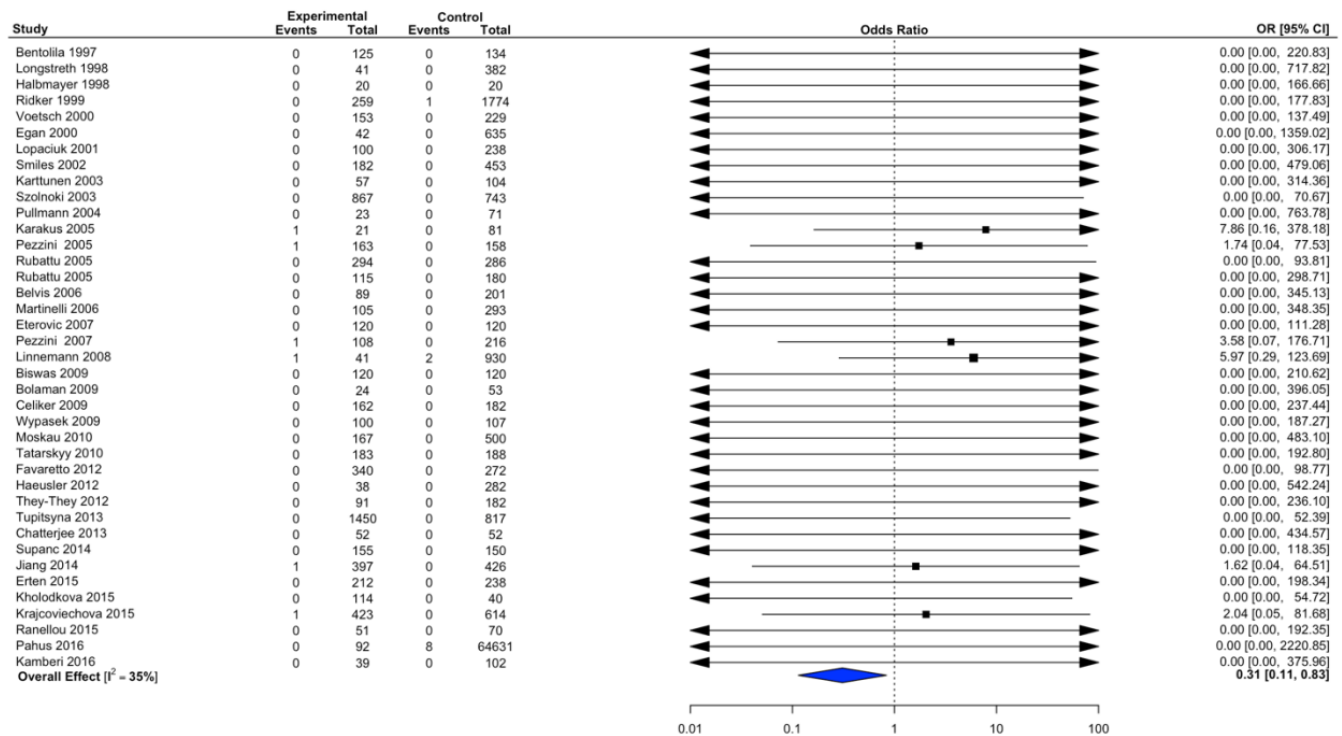

Figure S7. Forest plot showing pooled odds ratio for Factor V Leiden (Heterozygous).

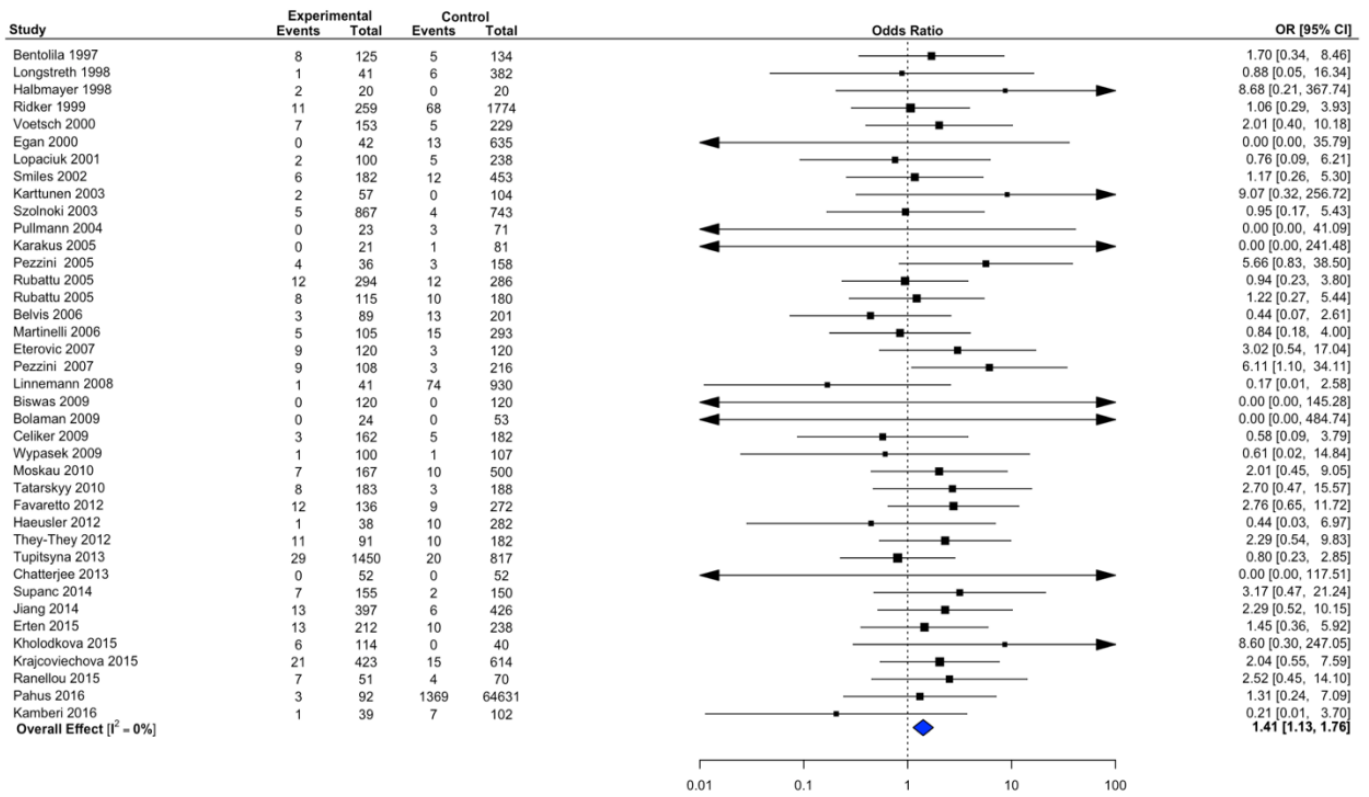

Figure S8. Forest plot showing pooled odds ratio for protein C deficiency.

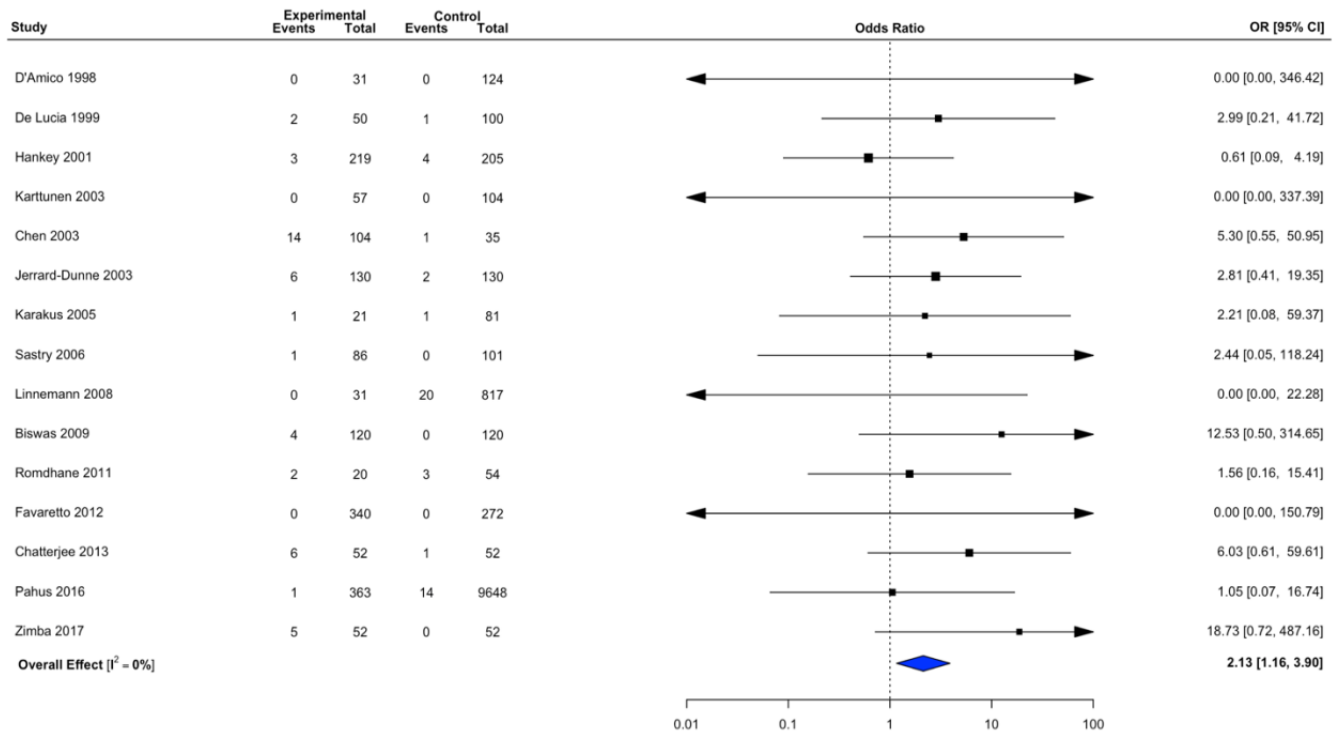

Figure S9. Forest plot showing pooled odds ratio for protein S deficiency.

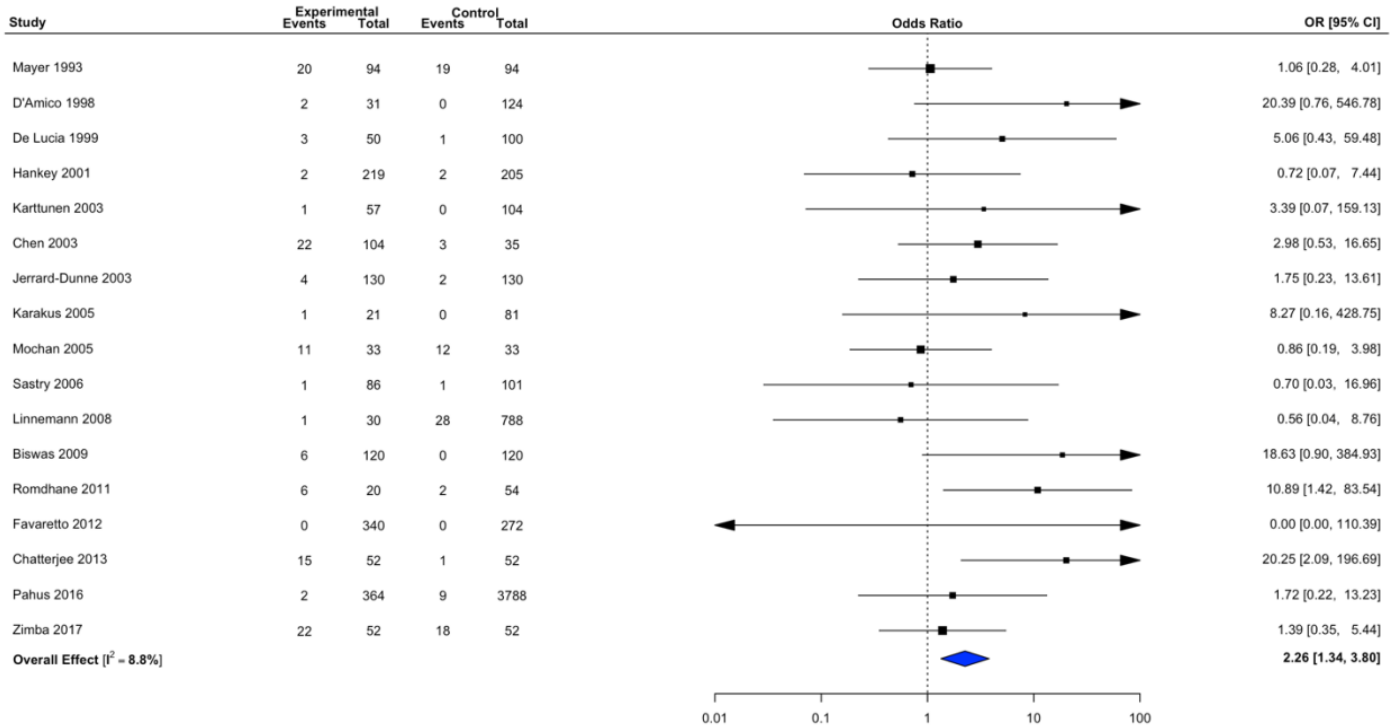

Figure S10. Forest plot showing pooled odds ratio for antithrombin deficiency.

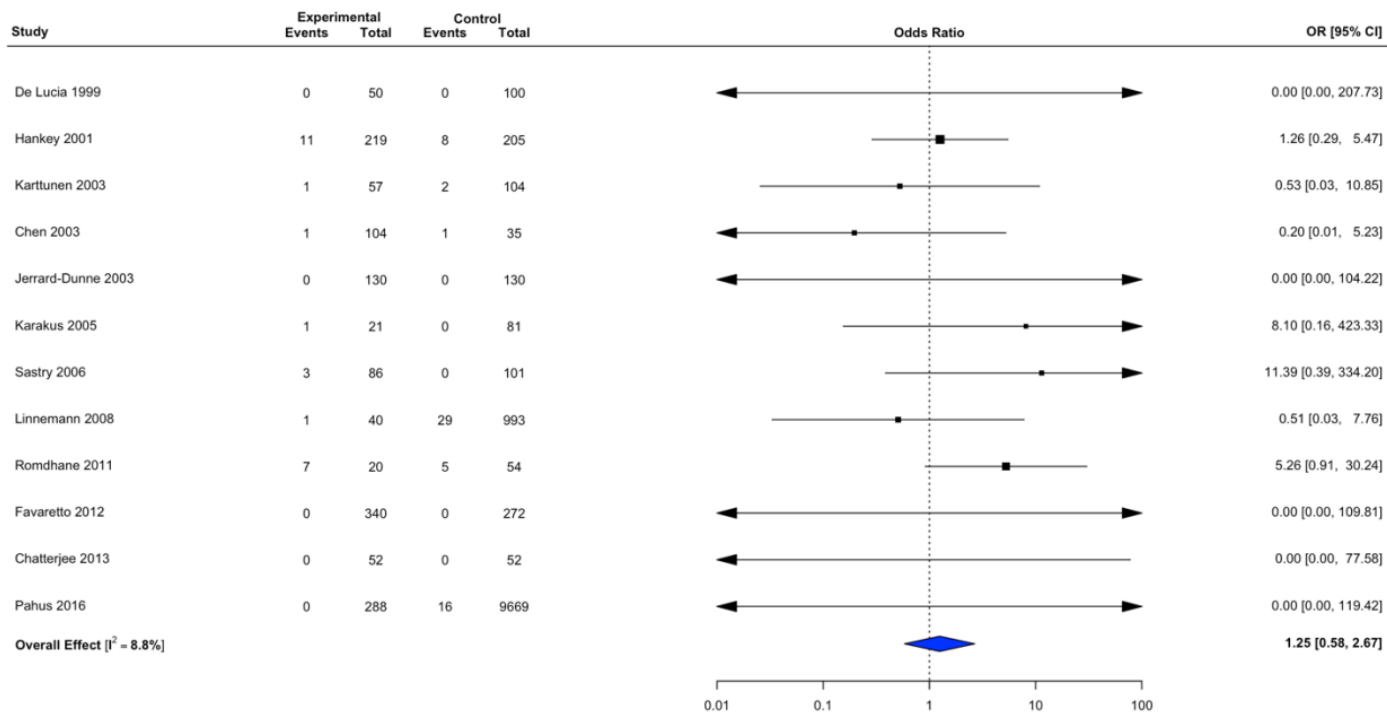

Figure S11. Subgroup Analyses: Factor V Leiden.

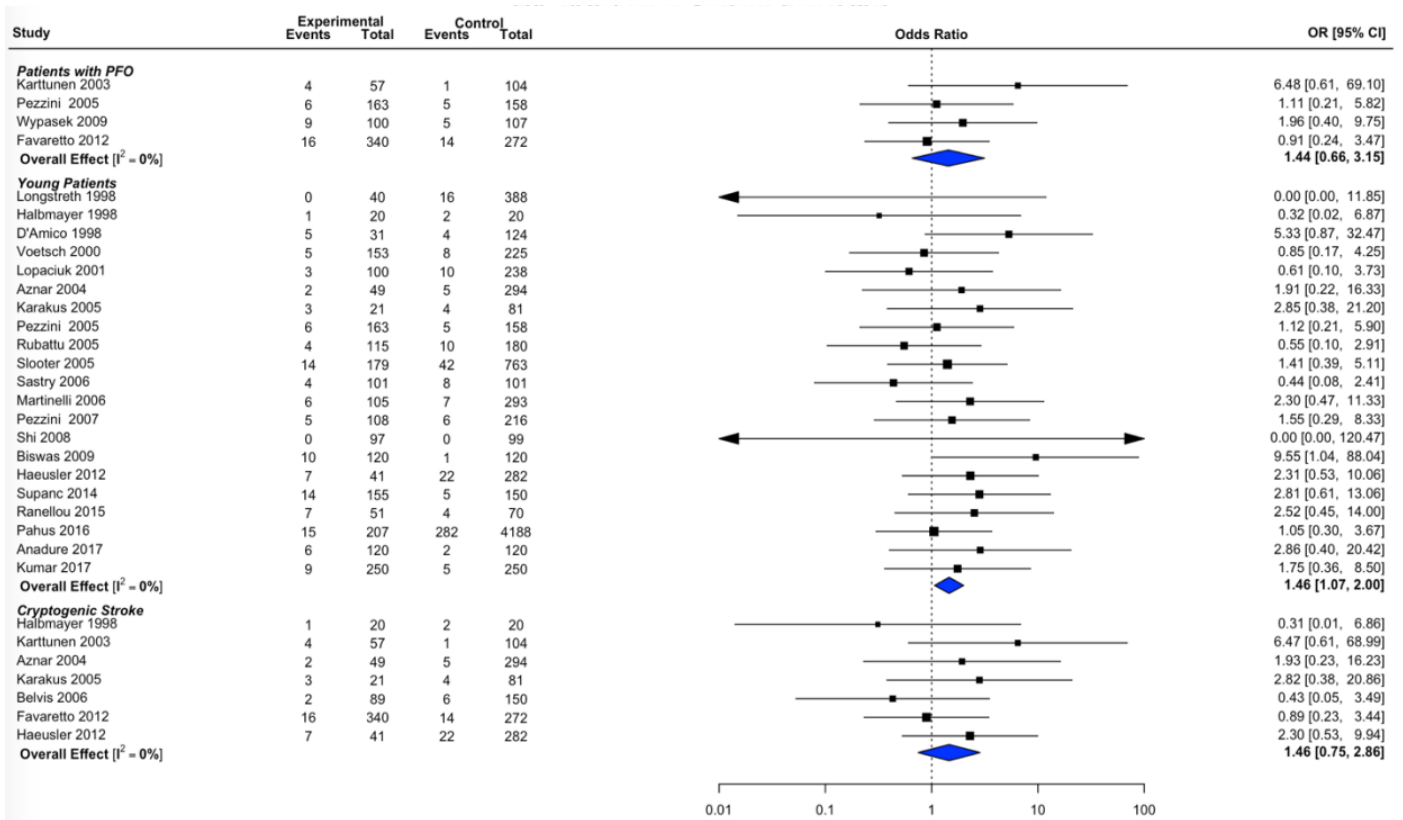

Figure S12. Subgroup Analyses: Prothrombin G20210A Mutation.

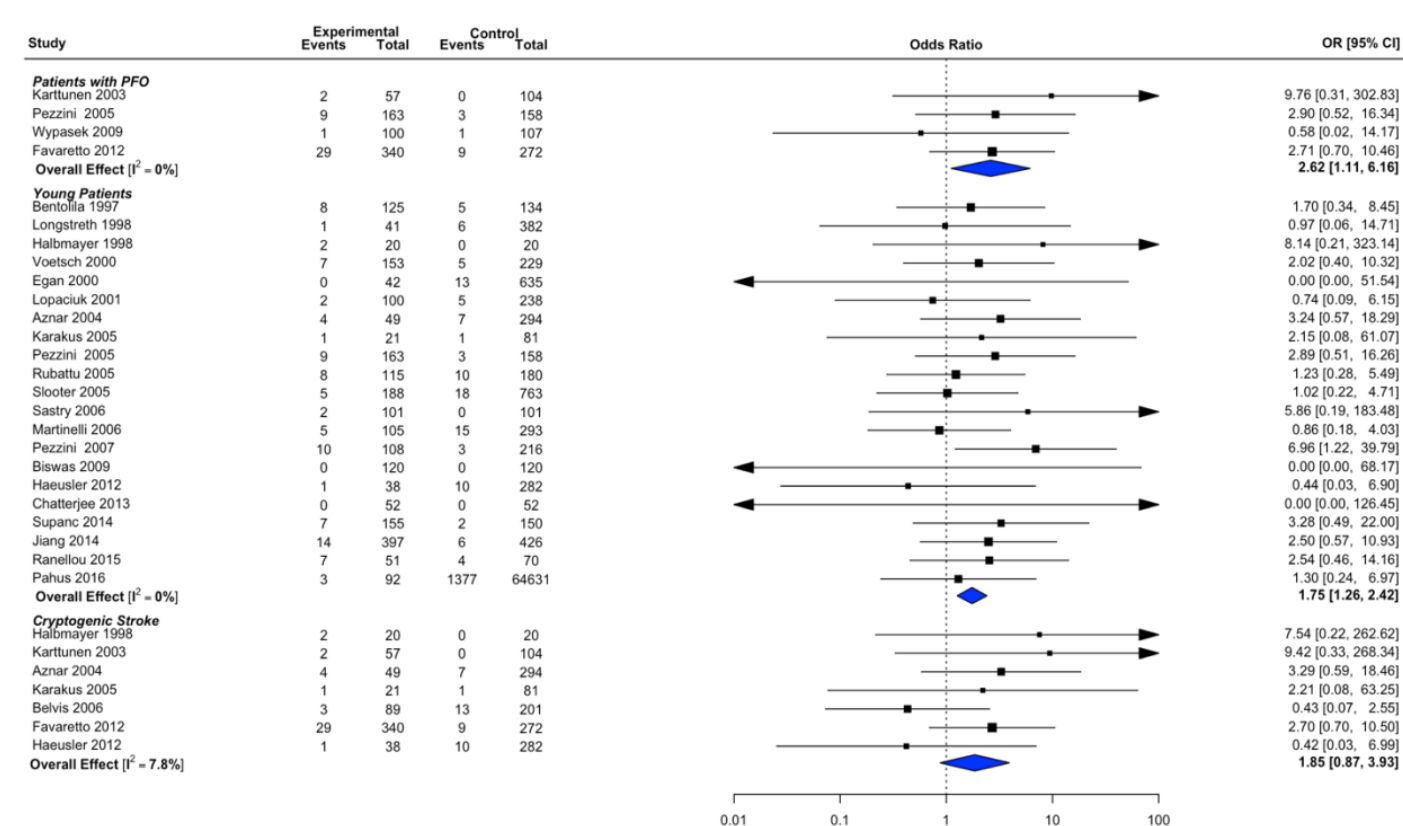



**Figure S13. Subgroup Analyses: Protein C Deficiency.**

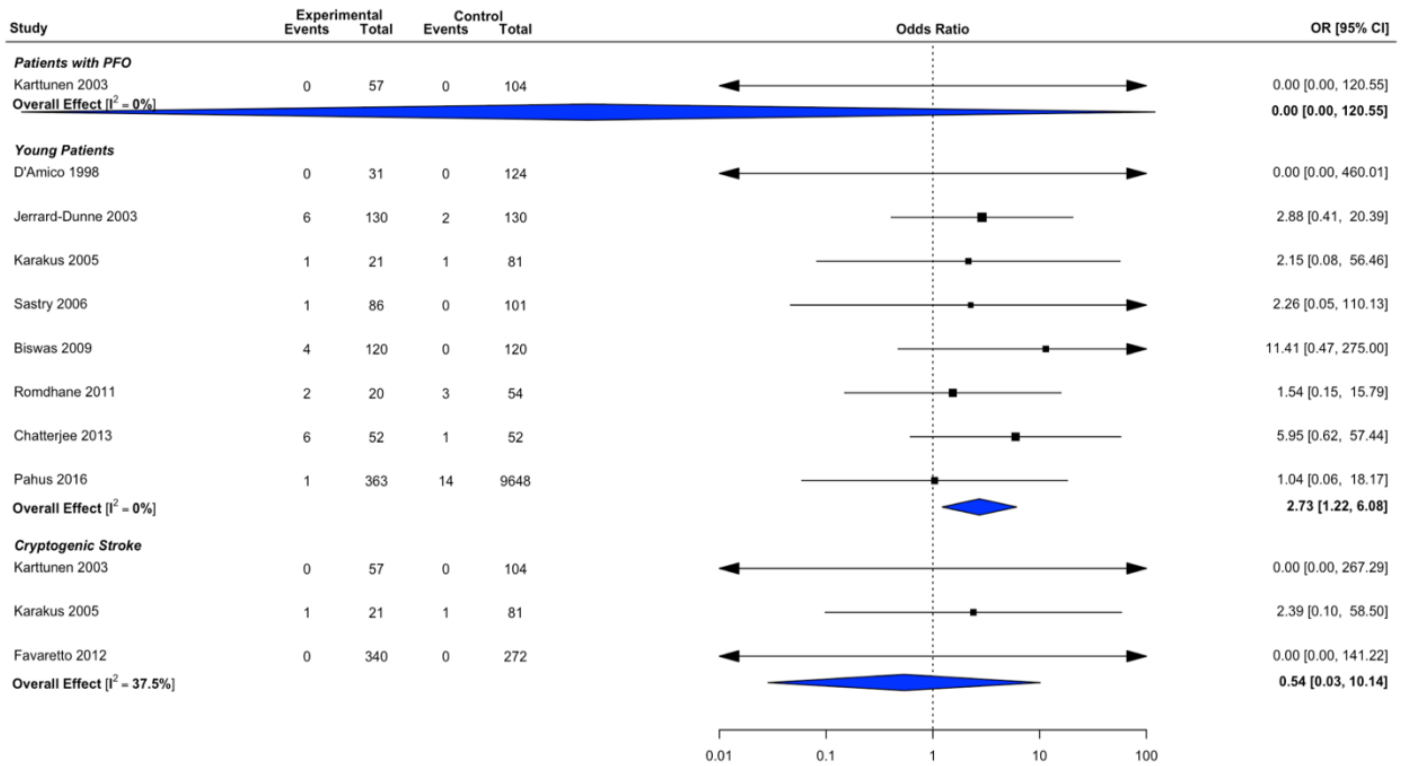

**Figure S14. Subgroup Analyses: Protein S Deficiency.**

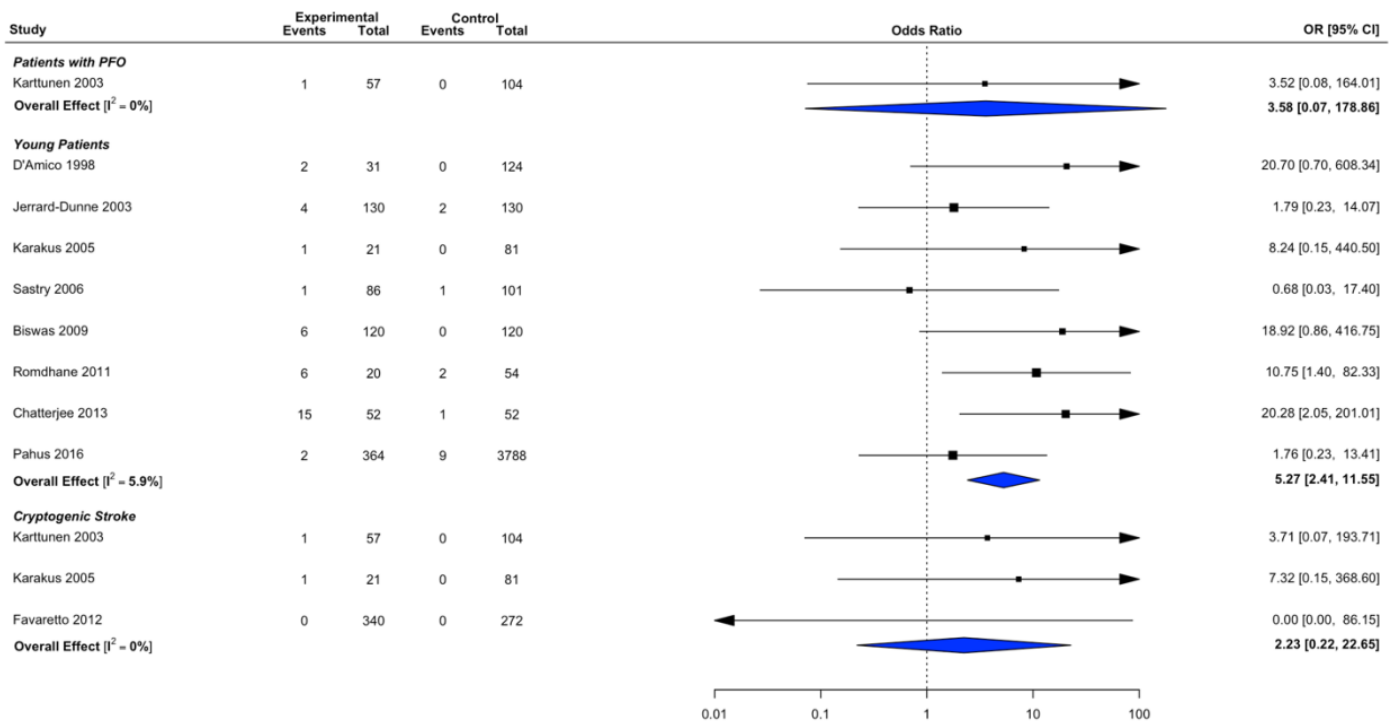

**Figure S15. Subgroup Analyses: Antithrombin Deficiency.**

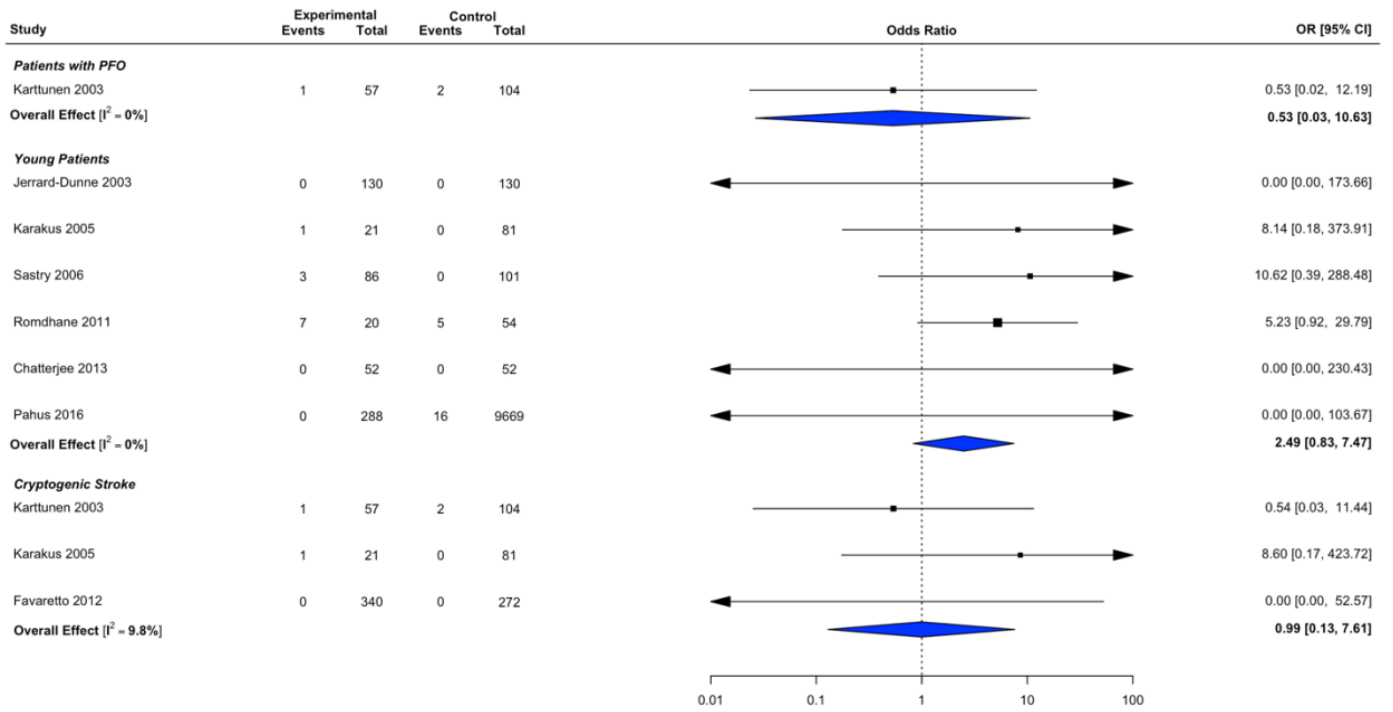

## Supplemental References:

1. Anadure RC, Nagaraja D, Narayanan C. A genetic study of Factor V Leiden (G1691A) mutation in young ischemic strokes with large vessel disease in a South Indian population. *Journal of Clinical Neuroscience*. 2017;44:346-52.
2. Aznar JM, Vaya A, Corella D, Ferrando F, Villa P, Estelles A. Factor V Leiden and prothrombin G20210A mutations in young adults with cryptogenic ischemic stroke. *Thromb Haemost*. 2004;91:1031-4.
3. Belvis RS, A.; Marti-Fabregas, J.; Cocho, D.; Borrell, M.; Fontcuberta, J.; Marti-Vilalta, J. L. Diagnostic yield of prothrombotic state studies in cryptogenic stroke. *Acta Neurol Scand*. 2006;114:250-3.
4. Bentolila SR, L.; Drouet, L.; Mazoyer, E.; Woimant, F. Thrombophilia due to 20210 G-->A prothrombin polymorphism and cerebral ischemia in the young. *Stroke*. 1997;28:1846-7.
5. Biswas AR, R.; Meena, A.; Akhter, S.; Sharma, V.; Yadav, B. K.; Behari, M.; Saxena, R. Prothrombotic factors and the risk of acute onset non-cardioembolic stroke in young Asian Indians. *Thromb Res*. 2009;124:397-402.
6. Bolaman ZO, A.; Kiylioglu, N.; Kadikoylu, G.; Erturk, A.; Batun, S.; Akyol, A. Hereditary thrombophilic factors in stroke due to cerebral infarct. *Am J Med Sci*. 2009;337:11-3.
7. Buyru NA, J.; Somay, G.; Ulutin, T. Factor V Leiden mutation in cerebrovascular disease. *Clin Appl Thromb Hemost*. 2005;11:339-42.
8. Catto AC, A.; Ireland, H.; Bayston, T. A.; Philippou, H.; Barrett, J.; Lane, D. A.; Grant, P. J. Factor V Leiden gene mutation and thrombin generation in relation to the development of acute stroke. *Arteriosclerosis, Thrombosis, and Vascular Biology*. 1995;15:783-5.
9. Celiker GC, U.; Verdi, H.; Yazici, A. C.; Ozbek, N.; Atac, F. B. Prevalence of thrombophilic mutations and ACE I/D polymorphism in Turkish ischemic stroke patients. *Clin Appl Thromb Hemost*. 2009;15:415-20.
10. Chatterjee TG, N.; Choudhry, V. P.; Behari, M.; Saxena, R.; Ashraf, M. Z. Prediction of ischemic stroke in young Indians: is thrombophilia profiling a way out? *Blood Coagul Fibrinolysis*. 2013;24:449-53.
11. Chen WHL, M. Y.; Chang, Y. Y.; Chen, S. S.; Liu, J. S. The prevalence of protein C, protein S, and antithrombin III deficiency in non-APS/SLE Chinese adults with noncardiac cerebral ischemia. *Clin Appl Thromb Hemost*. 2003;9:155-62.
12. Cushman MR, F. R.; Psaty, B. M.; Cook, E. F.; Valliere, J.; Kuller, L. H.; Tracy, R. P. Factor V Leiden is not a risk factor for arterial vascular disease in the elderly: results from the Cardiovascular Health Study. *Thromb Haemost*. 1998;79:912-5.
13. D'Amico DM, F.; Leone, M.; Ariano, C.; Ciusani, E.; Erba, N.; Grazi, L.; Ferraris, A.; Schieroni, F.; Bussone, G. Genetic abnormalities of the protein C system: shared risk factors in young adults with migraine with aura and with ischemic stroke? *Cephalalgia*. 1998;18:618-21; discussion 591.
14. De Lucia DP, M. L.; Ammendola, F.; Pezzella, S.; Del Giudice, V.; Marotta, R.; Renis, V.; Di Mauro, C.; Maisto, G.; Masi, S.; Nina, P.; Franco, A.; Schisano, G. Association of elevated levels of prothrombin fragment 1+2 and Arg506 to Gln mutation in patients with a history of ischemic stroke. *J Neurosurg Sci*. 1999;43:45-50; discussion -1.
15. Djordjevic VS, M.; Brankovic-Sreckovic, V.; Rakicevic, L.; Damnjanovic, T.; Antonijevic, N.; Radojkovic, D. Prothrombotic genetic risk factors in stroke: a

- possible different role in pediatric and adult patients. *Clin Appl Thromb Hemost.* 2012;18:658-61.
16. Egan RAK, J. M.; Press, R.; Lutsep, H. L. Lack of prothrombin gene mutation in young stroke patients. *Journal of Stroke and Cerebrovascular Diseases.* 2000;9:229-31.
  17. Erten ND, S.; Sütçü, R. Prevalence of thrombophilic mutations in ischemic stroke patients in isparta, Turkey. *Turk Noroloji Dergisi.* 2015;21:42-8.
  18. Eterovic DT, M.; Culic, V.; Zadro, R.; Primorac, D. Lower contribution of factor V Leiden or G202104 mutations to ischemic stroke in patients with clinical risk factors: pair-matched case-control study. *Clin Appl Thromb Hemost.* 2007;13:188-93.
  19. Fan AZF, J.; Yesupriya, A.; Chang, M.; Kilmer, G.; House, M.; Hayes, D.; Ned, R. M.; Dowling, N. F.; Mokdad, A. H. Gene polymorphisms in association with self-reported stroke in US adults. *Application of Clinical Genetics.* 2010;3:23-8.
  20. Favaretto ES, M.; Conti, E.; Legnani, C.; Palareti, G. G1691A factor V and G20210A FII mutations, acute ischemic stroke of unknown cause, and patent foramen ovale. *Thromb Res.* 2012;130:720-4.
  21. Go ASR, G. L.; Hylek, E. M.; Phillips, K. A.; Liu, L.; Henault, L. E.; Selby, J. V.; Singer, D. E. Factor V Leiden and risk of ischemic stroke in nonvalvular atrial fibrillation: the AnTicoagulation and Risk Factors in Atrial Fibrillation (ATRIA) Study. *J Thromb Thrombolysis.* 2003;15:41-6.
  22. Haeusler KGH, J.; Hoppe, B.; Kasabov, R.; Malzahn, U.; Endres, M.; Koscielny, J.; Jungehulsing, G. J. Thrombophilia screening in young patients with cryptogenic stroke. Prevalence of gene polymorphisms compared to healthy blood donors and impact on secondary stroke prevention. *Hamostaseologie.* 2012;32:147-52.
  23. Halbmayr WMH, A.; Hermann, K. M.; Fischer, M. The 20210A allele of the prothrombin gene: a risk factor for juvenile stroke? Result of a pilot study. *Blood Coagul Fibrinolysis.* 1998;9:209-10.
  24. Hamedani AGC, J. W.; Cheng, Y.; Sparks, M. J.; O'Connell, J. R.; Stine, O. C.; Wozniak, M. A.; Stern, B. J.; Mitchell, B. D.; Kittner, S. J. Factor V Leiden and ischemic stroke risk: the Genetics of Early Onset Stroke (GEOS) study. *J Stroke Cerebrovasc Dis.* 2013;22:419-23.
  25. Hankey GJE, J. W.; van Bockxmeer, F. M.; Lofthouse, E.; Staples, N.; Baker, R. I. Inherited thrombophilia in ischemic stroke and its pathogenic subtypes. *Stroke.* 2001;32:1793-9.
  26. Jerrard-Dunne PE, A.; McGovern, R.; Hajat, C.; Kalra, L.; Rudd, A. G.; Wolfe, C. D.; Markus, H. S. Ethnic differences in markers of thrombophilia: implications for the investigation of ischemic stroke in multiethnic populations: the South London Ethnicity and Stroke Study. *Stroke.* 2003;34:1821-6.
  27. Jiang BR, K. A.; Hamedani, A.; Cheng, Y.; Sparks, M. J.; Koontz, D.; Bean, C. J.; Gallagher, M.; Hooper, W. C.; McArdle, P. F.; O'Connell, J. R.; Stine, O. C.; Wozniak, M. A.; Stern, B. J.; Mitchell, B. D.; Kittner, S. J.; Cole, J. W. Prothrombin G20210A mutation is associated with young-onset stroke: the genetics of early-onset stroke study and meta-analysis. *Stroke.* 2014;45:961-7.
  28. Juul KT-H, A.; Steffensen, R.; Kofoed, S.; Jensen, G.; Nordestgaard, B. G. Factor V Leiden: The Copenhagen City Heart Study and 2 meta-analyses. *Blood.* 2002;100:3-10.
  29. Kamberi BK, F.; Spiroski, M. Vascular genetic variants and ischemic stroke susceptibility in Albanians from the Republic of Macedonia. *Macedonian Journal of Medical Sciences.* 2016;4:556-64.

30. Karakuş ZG, E.; Başlamışlı, F.; Tanriverdi, K. Prothrombotic heritable risk factors for cerebral ischemic infarction, acute myocardial infarction and venous thrombosis in young adult Turkish patients. *Annals of Medical Sciences*. 2005;14:31-6.
31. Karttunen VH, L.; Rasi, V.; Vahtera, E.; Hillbom, M. Factor V Leiden and prothrombin gene mutation may predispose to paradoxical embolism in subjects with patent foramen ovale. *Blood Coagul Fibrinolysis*. 2003;14:261-8.
32. Kholodkova OLBV, M. K.; Torgalo, E. O.; Vovk, T. B.; Kravchenko, N. K.; Raksha, N. G.; Melnyk, V. S.; Savchuk, O. M.; Ostapchenko, L. I. FII G20210A and FV Leiden G1691A polymorphisms in patients with atherothrombotic and cardioembolic ischemic stroke from Ukraine. *Research Journal of Pharmaceutical, Biological and Chemical Sciences*. 2015;6:1568-71.
33. Krajcoviechova AW, P.; Mayer, O., Jr.; Vanek, J.; Hajkova, J.; Hlinovsky, D.; Kvasnicka, T.; Tremblay, J.; Hamet, P.; Filipovsky, J.; Kvasnicka, J.; Cifkova, R. Tobacco smoking strongly modifies the association of prothrombin G20210A with undetermined stroke: consecutive survivors and population-based controls. *Atherosclerosis*. 2015;240:446-52.
34. Kumar AM, S.; Sagar, R.; Kumar, P.; Yadav, A.; Talwar, P.; Raj, R.; Prasad, K. Relationship between factor v leiden gene variant and risk of ischemic stroke: A case-control study. *Annals of Indian Academy of Neurology*. 2017;20:284-8.
35. Linnemann BS, M.; Zgouras, D.; Erbe, M.; Jarosch-Preusche, M.; Lindhoff-Last, E. Are patients with thrombophilia and previous venous thromboembolism at higher risk to arterial thrombosis? *Thromb Res*. 2008;121:743-50.
36. Longstreth WT, Jr.; Rosendaal, F. R.; Siscovick, D. S.; Vos, H. L.; Schwartz, S. M.; Psaty, B. M.; Raghunathan, T. E.; Koepsell, T. D.; Reitsma, P. H. Risk of stroke in young women and two prothrombotic mutations: factor V Leiden and prothrombin gene variant (G20210A). *Stroke*. 1998;29:577-80.
37. Lopaciuk SB, K.; Kwiecinski, H.; Mickielewicz, A.; Czlonkowska, A.; Mendel, T.; Kuczynska-Zardzewialy, A.; Szlagowska, D.; Windyga, J.; Schroder, W.; Herrmann, F. H.; Jedrzejowska, H. Factor V Leiden, prothrombin gene G20210A variant, and methylenetetrahydrofolate reductase C677T genotype in young adults with ischemic stroke. *Clin Appl Thromb Hemost*. 2001;7:346-50.
38. Martinelli IB, T.; Burgo, I.; Di Domenico, S.; Mannucci, P. M. Oral contraceptive use, thrombophilia and their interaction in young women with ischemic stroke. *Haematologica*. 2006;91:844-7.
39. Mayer SAS, R. L.; Hurlet-Jensen, A.; Shi, T.; Mohr, J. P. Free protein S deficiency in acute ischemic stroke. A case-control study. *Stroke*. 1993;24(2):224-7.
40. Mochan AM, M.; Modi, G. Protein S deficiency in HIV associated ischaemic stroke: an epiphenomenon of HIV infection. *J Neurol Neurosurg Psychiatry*. 2005;76:1455-6.
41. Moskau SS, K.; Semmler, A.; Schweichel, D.; Harbrecht, U.; Muller, J.; Pohl, C.; Klockgether, T.; Linnebank, M. Common genetic coagulation variants are not associated with ischemic stroke in a case-control study. *Neurol Res*. 2010;32:519-22.
42. Nagayama TN, M.; Tsuda, M.; Yoshii, F.; Shinohara, Y. Low prevalence of activated protein C resistance and factor V Leiden in ischemic stroke in Japan. *Cerebrovascular Diseases*. 1996;6:356-9.
43. Pahus SHH, A. T.; Hvas, A. M. Thrombophilia testing in young patients with ischemic stroke. *Thromb Res*. 2016;137:108-12.
44. Pestana CIT, A.; Blanco, S.; Rojas, M. J.; Mendez, C.; Lopez, J. L.; de Bosch, N. B.; Porco, A. Factor V Leiden and the risk of venous thrombosis, myocardial infarction,

- and stroke: a case-control study in Venezuela. *Genet Test Mol Biomarkers*. 2009;13:537-42.
45. Petrovic DM, T.; Kobal, J.; Bregar, D.; Potisk, K. P.; Peterlin, B. Prothrombotic gene polymorphisms and atherothrombotic cerebral infarction. *Acta Neurol Scand*. 2003;108:109-13.
  46. Pezzini AG, M.; Del Zotto, E.; Archetti, S.; Spezi, R.; Vergani, V.; Assanelli, D.; Caimi, L.; Padovani, A. Cumulative effect of predisposing genotypes and their interaction with modifiable factors on the risk of ischemic stroke in young adults. *Stroke*. 2005;36:533-9.
  47. Pezzini AG, M.; Iacoviello, L.; Del Zotto, E.; Archetti, S.; Giossi, A.; Padovani, A. Inherited thrombophilia and stratification of ischaemic stroke risk among users of oral contraceptives. *J Neurol Neurosurg Psychiatry*. 2007;78:271-6.
  48. Press RDL, X. Y.; Beamer, N.; Coull, B. M. Ischemic stroke in the elderly. Role of the common factor V mutation causing resistance to activated protein C. *Stroke*. 1996;27:44-8.
  49. Pullmann R, Jr.; Skerenova, M.; Lukac, J.; Hybenova, J.; Melus, V.; Kubisz, P.; Rovensky, J.; Pullmann, R. Factor V Leiden and prothrombin G20210A mutations and the risk of atherothrombotic events in systemic lupus erythematosus. *Clin Appl Thromb Hemost*. 2004;10:233-8.
  50. Ranellou KP, A.; Kyriazopoulos, P.; Batistatou, A.; Evangelou, A.; El-Aly, M.; Zis, P.; Tavernarakis, A.; Charalabopoulos, K. Polymorphisms in prothrombotic genes in young stroke patients in Greece: a case-controlled study. *Blood Coagul Fibrinolysis*. 2015;26:430-5.
  51. Ridker PMH, C. H.; Lindpaintner, K.; Stampfer, M. J.; Eisenberg, P. R.; Miletich, J. P. Mutation in the gene coding for coagulation factor V and the risk of myocardial infarction, stroke, and venous thrombosis in apparently healthy men. *N Engl J Med*. 1995;332:912-7.
  52. Ridker PMH, C. H.; Miletich, J. P. G20210A mutation in prothrombin gene and risk of myocardial infarction, stroke, and venous thrombosis in a large cohort of US men. *Circulation*. 1999;99:999-1004.
  53. Ripoll LM, E.; Woimant, F.; Drouet, L. O. Different contribution of factor V Leiden-associated hypercoagulability to ischaemic cerebrovascular disease in the elderly. *Blood Coagul Fibrinolysis*. 1997;8:253-4.
  54. Romdhane NBB, H.; Lahmar, M.; Mahjoub, S.; Manai, Z. Deficiency of coagulation inhibitors in young adults with ischemic stroke. *Journal of Thrombosis and Haemostasis*. 2011;9:899.
  55. Rubattu SDA, E.; Nitsch, D.; Gigante, B.; Zanda, B.; Stanzione, R.; Evangelista, A.; Pirisi, A.; Rosati, G.; Volpe, M. Polymorphisms in prothrombotic genes and their impact on ischemic stroke in a Sardinian population. *Thrombosis and Haemostasis*. 2005;93:1095-100.
  56. Rubattu SS, R.; Ferrari, M.; Evangelista, A.; Beccia, M.; Stanzione, R.; Assenza, G. E.; Volpe, M.; Rasura, M. A role of TNF- $\alpha$  gene variant on juvenile ischemic stroke: A case-control study. *European Journal of Neurology*. 2005;12:989-93.
  57. Sastry SR, G.; Morris, J.; Taberner, D.; Cherry, N.; Heagerty, A.; McCollum, C. Young Adult Myocardial Infarction and Ischemic Stroke: the role of paradoxical embolism and thrombophilia (The YAMIS Study). *J Am Coll Cardiol*. 2006;48:686-91.
  58. Shi CK, X.; Wang, Y.; Zhou, Y. The coagulation factor V Leiden, MTHFRC677T variant and eNOS 4ab polymorphism in young Chinese population with ischemic stroke. *Clin Chim Acta*. 2008;396:7-9.

59. Slooter AJCR, F. R.; Tanis, B. C.; Kemmeren, J. M.; Van Der Graaf, Y.; Algra, A. Prothrombotic conditions, oral contraceptives, and the risk of ischemic stroke. *Journal of Thrombosis and Haemostasis*. 2005;3:1213-7.
60. Smiles AMJ, N. S.; Tang, Z.; Arnold, A.; Cushman, M.; Tracy, R. P. No association of plasma prothrombin concentration or the G20210A mutation with incident cardiovascular disease: results from the Cardiovascular Health Study. *Thromb Haemost*. 2002;87:614-21.
61. Supanc VS, Z.; Vukasovic, I.; Solter, V. V.; Zavoreo, I.; Kes, V. B. The role of classic risk factors and prothrombotic factor gene mutations in ischemic stroke risk development in young and middle-aged individuals. *J Stroke Cerebrovasc Dis*. 2014;23:e171-6.
62. Szolnoki ZS, F.; Kondacs, A.; Szabo, M.; Fodor, L.; Bene, J.; Melegh, B. Evaluation of the modifying effects of unfavourable genotypes on classical clinical risk factors for ischaemic stroke. *J Neurol Neurosurg Psychiatry*. 2003;74:1615-20.
63. Tatarsky PFK, A. M.; Kravchenko, S. A.; Shulzenko, D. V.; Kuznetsova, S. M.; Livshits, L. A. Ischemic stroke in Ukrainian population: Possible involvement of the F2 G20210A, F5 G1691A and MTHFR C677T gene variants. *Biopolymers and Cell*. 2010;26:299-305.
64. They-They TPB, O.; Slassi, I.; Rafai, M. A.; Katumbay, D. T.; Nadifi, S. Prothrombin G20210A and factor V Leiden polymorphisms in stroke. *J Mol Neurosci*. 2012;46:210-6.
65. Tupitsyna TVB, E. A.; Kravchenko, S. A.; Tatarsky P. F.; Shetova, I. M.; Shamalov, N. A.; Kuznetsova, S. M.; Shul'Zhenko, D. V.; Skvortsova, V. I.; Slominsky, P. A.; Livshits, L. A.; Limborska, S. A. Comparative analysis of associations between polymorphic variants of the F2, F5, GP1BA, and ACE genes and the risk of developing stroke in Russian and Ukrainian populations. *Molecular Genetics, Microbiology and Virology*. 2013;28:8-14.
66. Voetsch BD, B. P.; Camargo, E. C.; Massaro, A.; Bacheschi, L. A.; Scaff, M.; Annichino-Bizzacchi, J. M.; Arruda, V. R. Inherited thrombophilia as a risk factor for the development of ischemic stroke in young adults. *Thromb Haemost*. 2000;83:229-33.
67. Wypasek ES, E.; Pieculewicz, M.; Podolec, P.; Undas, A. Factor XIII Val34Leu polymorphism and ischaemic stroke in patients with patent foramen ovale. *Thromb Haemost*. 2009;102:1280-2.
68. Zimba SN, P. M.; Lakhi, S.; Atadzhanov, M. HIV infection, hypercoagulability and ischaemic stroke in adults at the University Teaching Hospital in Zambia: a case control study. *BMC Infect Dis*. 2017;17:354.
